# Supplementary material
Source: PubMed Central journal article supplement (PMC3309746)
Supplement: 1113828109_sapp01.pdf [file 1113828109_sapp01.pdf]

Genre:ballad  
Original spectra

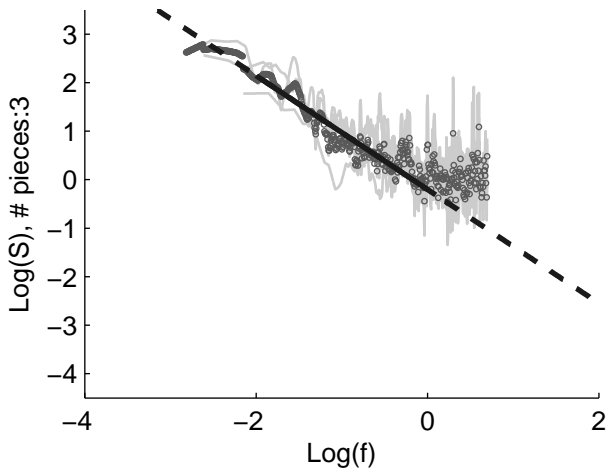

$\mu$  original: 1.190

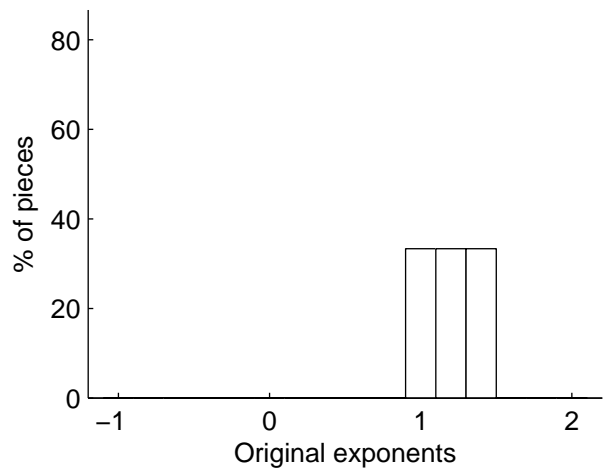

Shuffled spectra

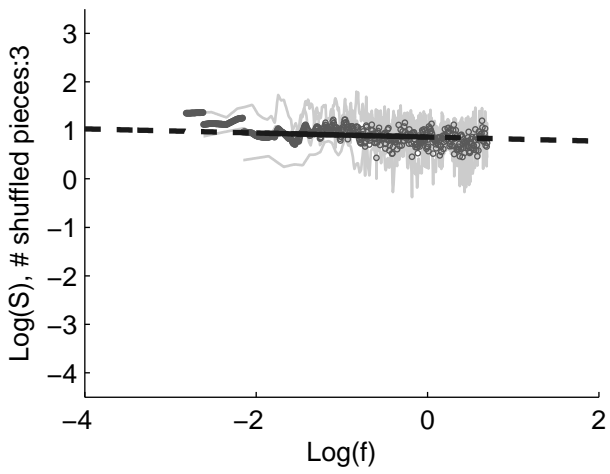

$\mu$  shuffled: -0.002

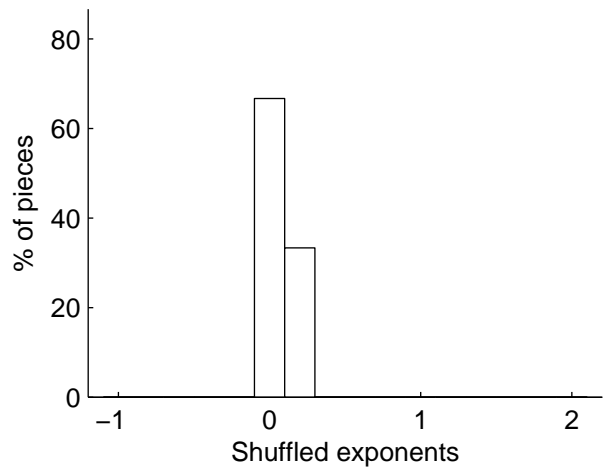

Original > Shuffled:  $p < 0.250$

Genre:chorale

Original spectra

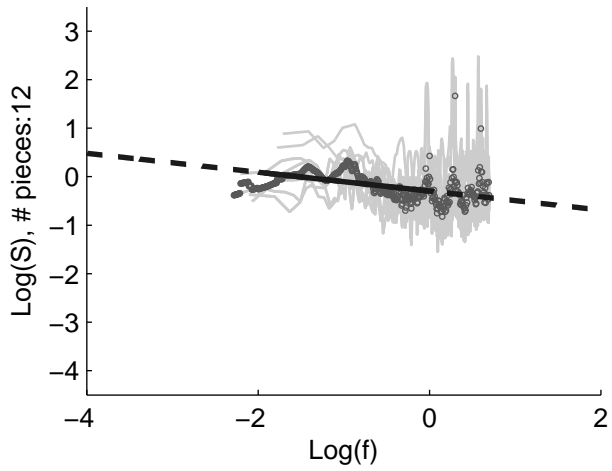

$\mu$  original: 0.284

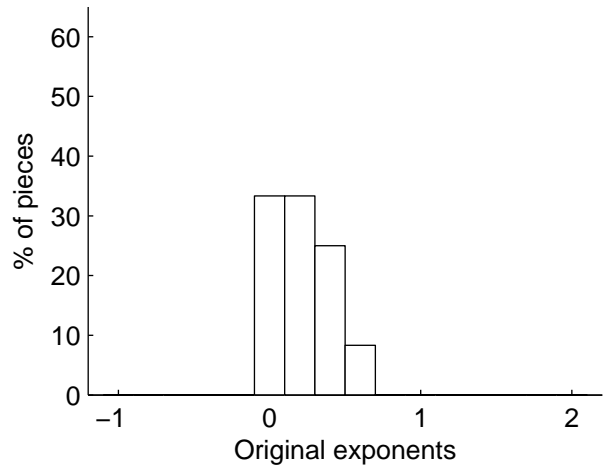

Shuffled spectra

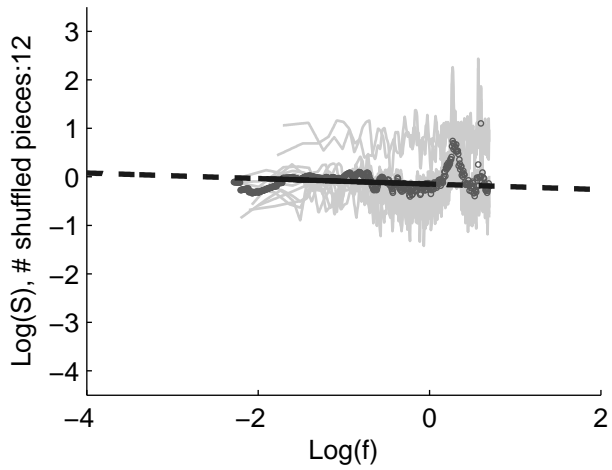

$\mu$  shuffled: 0.115

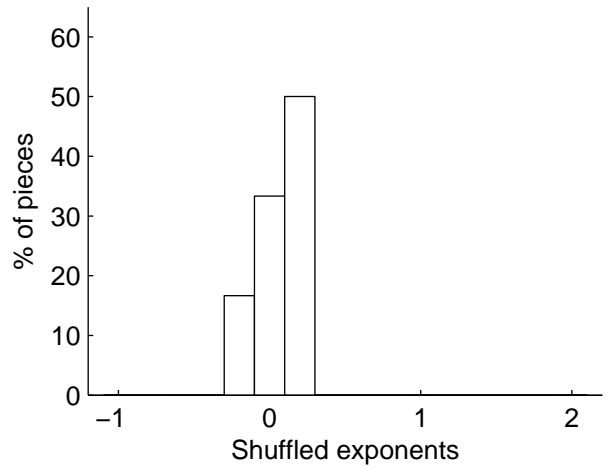

Original > Shuffled:  $p < 0.027$

**Genre:contrafacta**

Original spectra

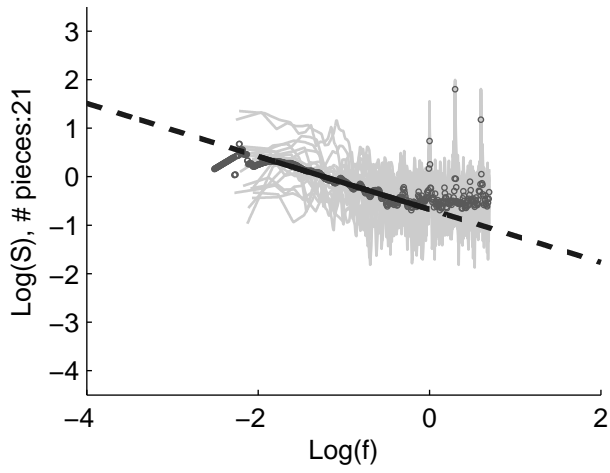

$\mu$  original: 0.495

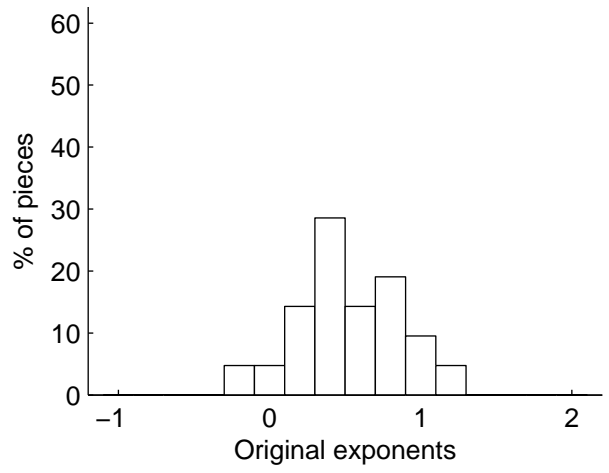

Shuffled spectra

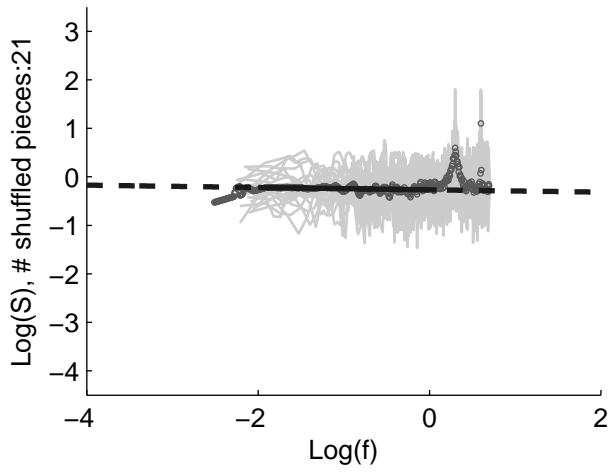

$\mu$  shuffled: -0.023

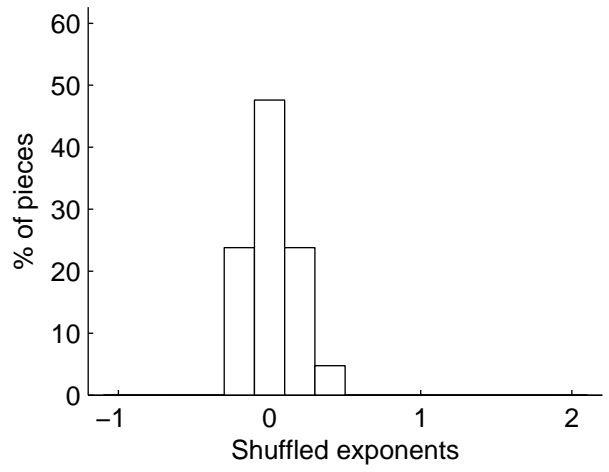

Original > Shuffled:  $p < 0.000$

**Genre:etude**

Original spectra

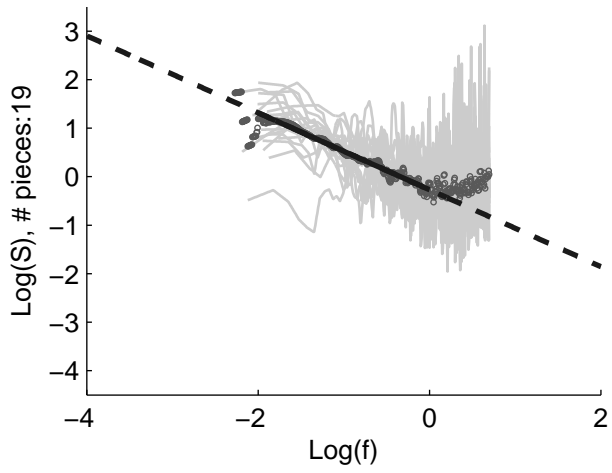

$\mu$  original: 0.898

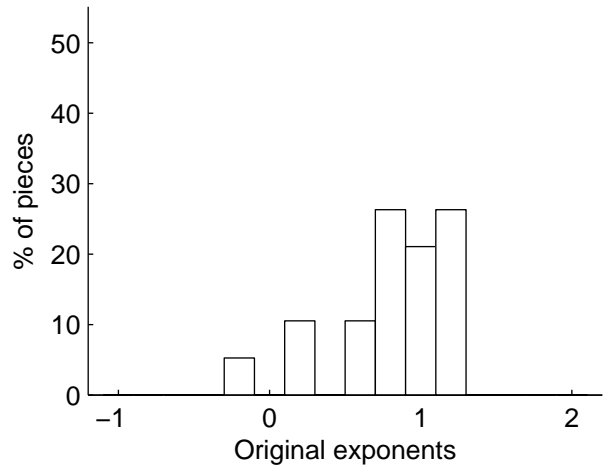

Shuffled spectra

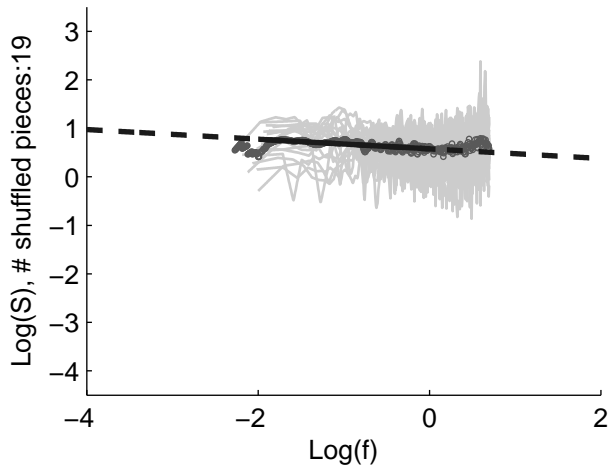

$\mu$  shuffled: 0.107

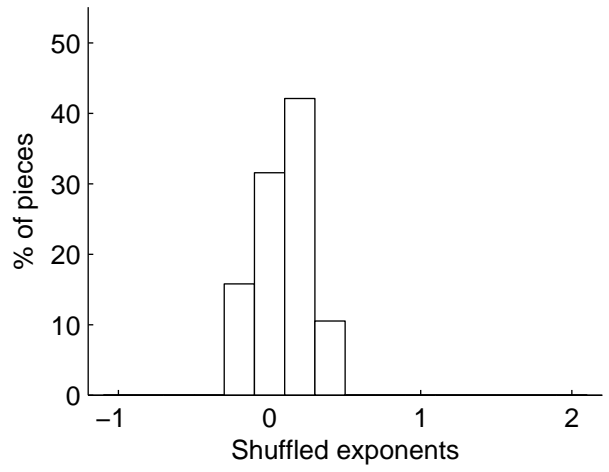

Original > Shuffled:  $p < 0.000$

**Genre:fugue**

Original spectra

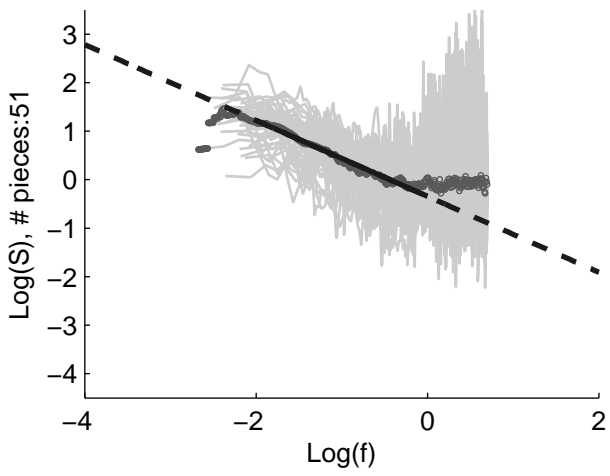

$\mu$  original: 0.764

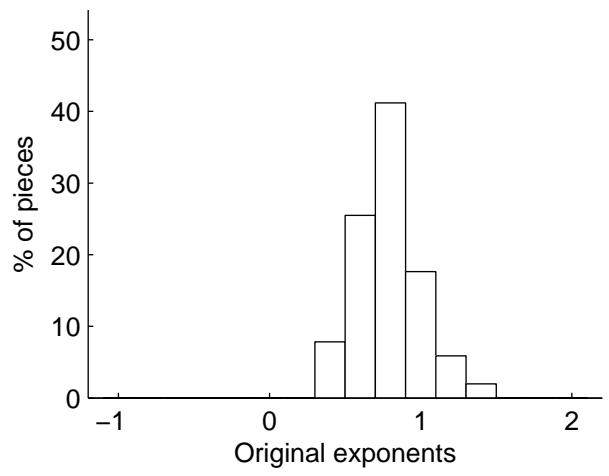

Shuffled spectra

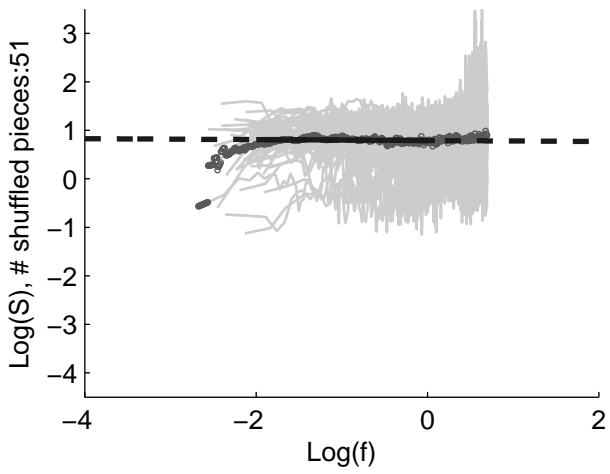

$\mu$  shuffled: 0.017

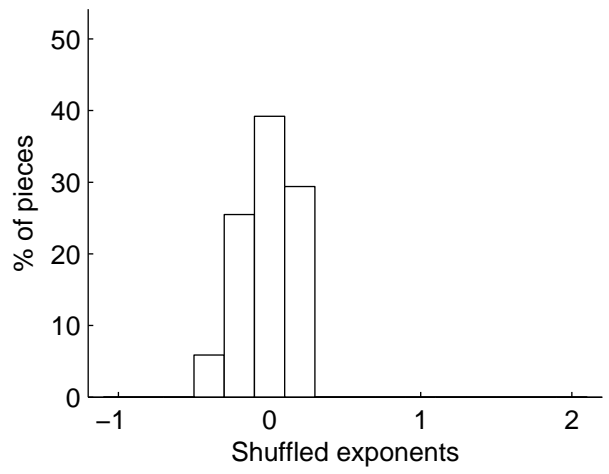

Original > Shuffled:  $p < 0.000$

**Genre:madrigal**

Original spectra

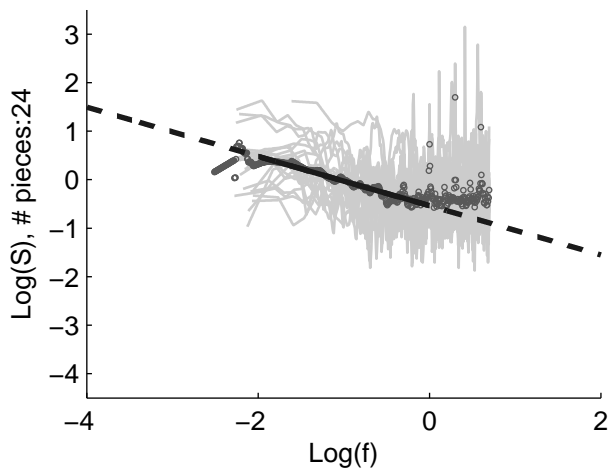

$\mu$  original: 0.501

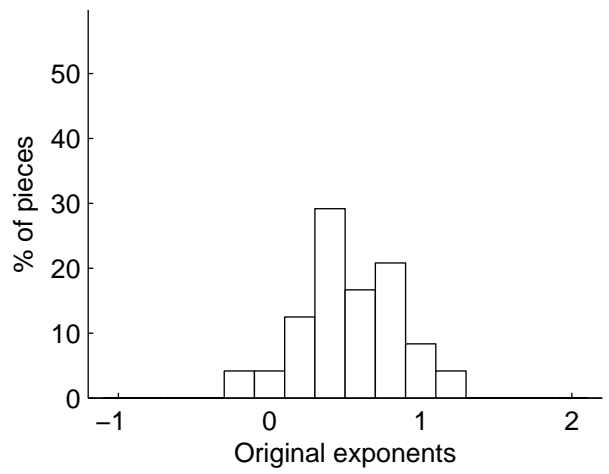

Shuffled spectra

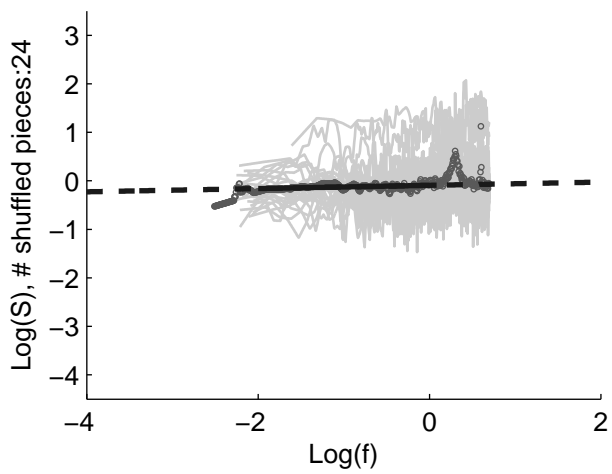

$\mu$  shuffled: -0.028

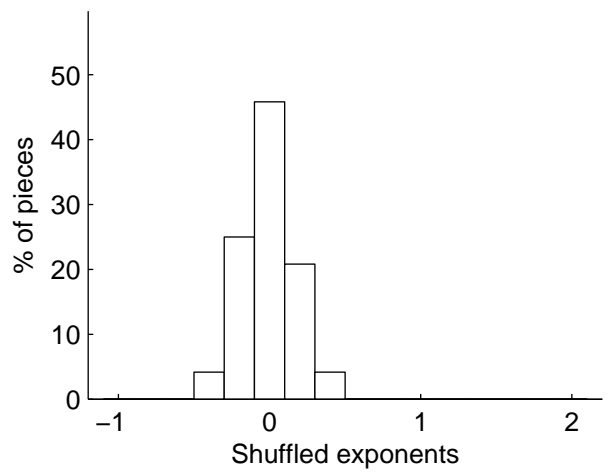

Original > Shuffled:  $p < 0.000$

Genre:mazurka  
Original spectra

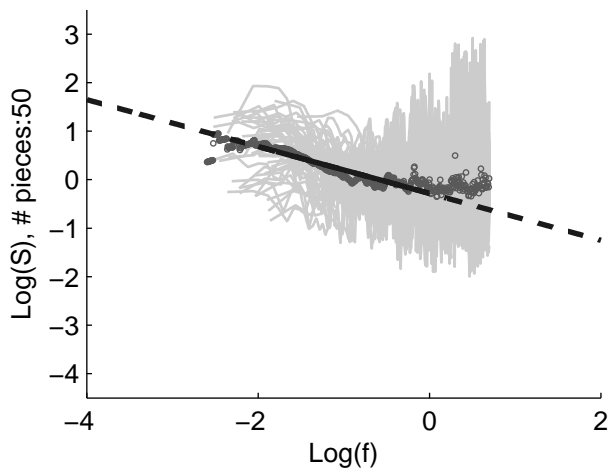

$\mu$  original: 0.589

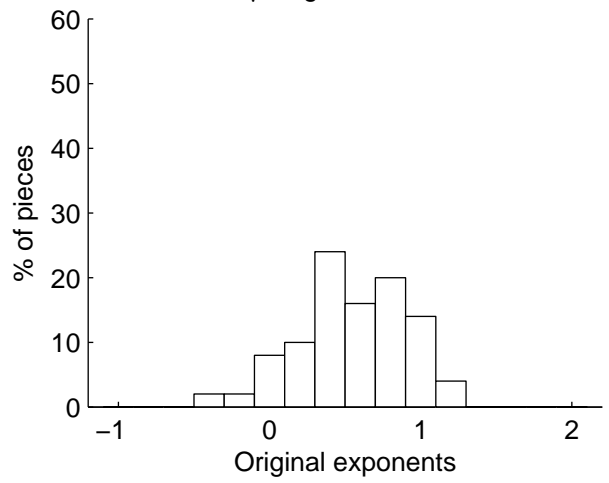

Shuffled spectra

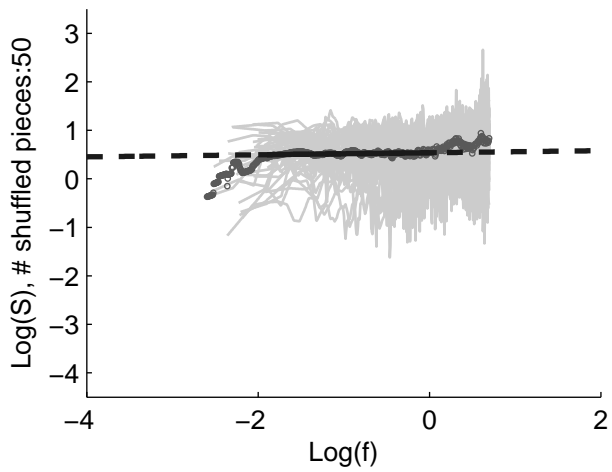

$\mu$  shuffled: -0.007

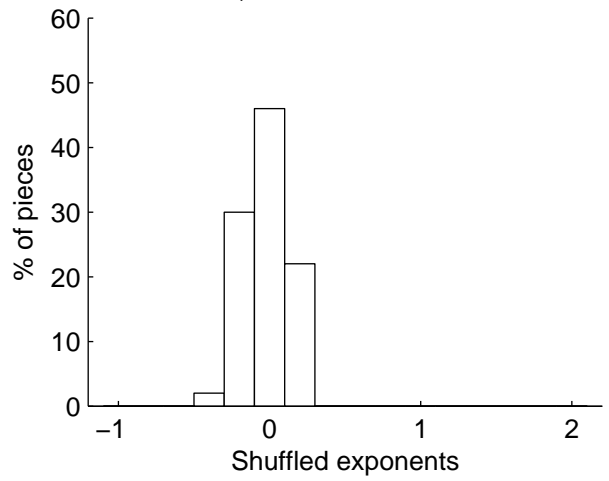

Original > Shuffled:  $p < 0.000$

Genre: motet

Original spectra

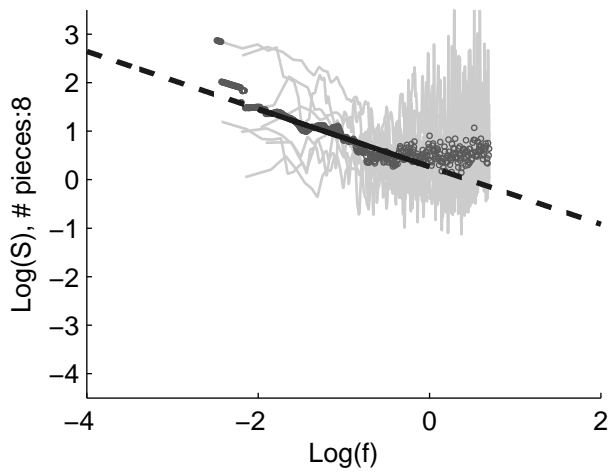

$\mu$  original: 0.491

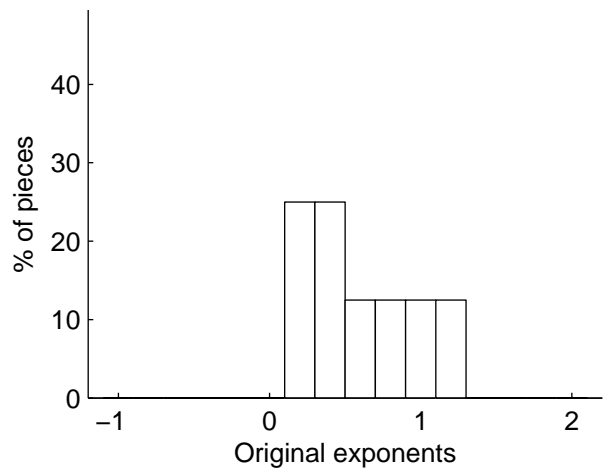

Shuffled spectra

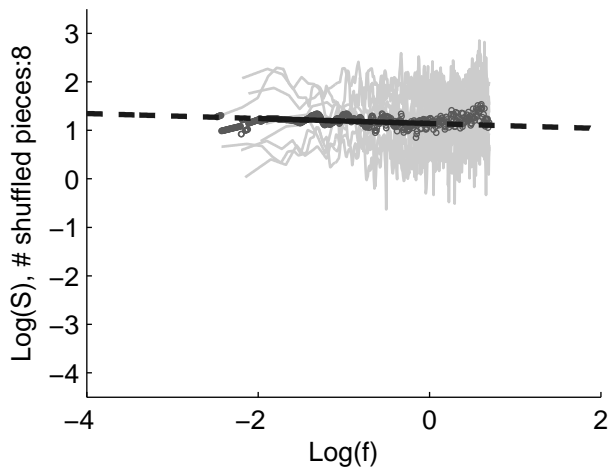

$\mu$  shuffled: 0.042

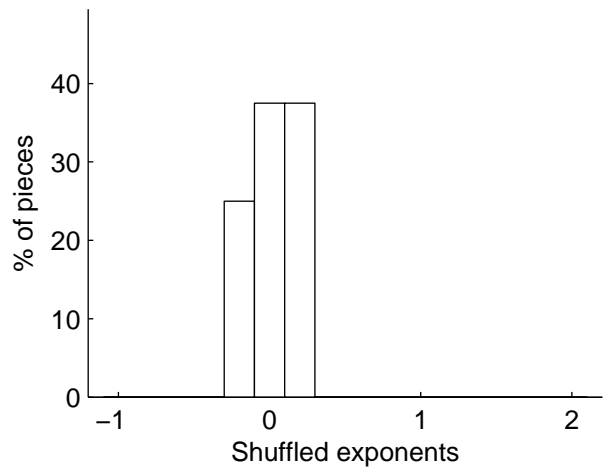

Original > Shuffled:  $p < 0.008$



**Genre:prelude**

Original spectra

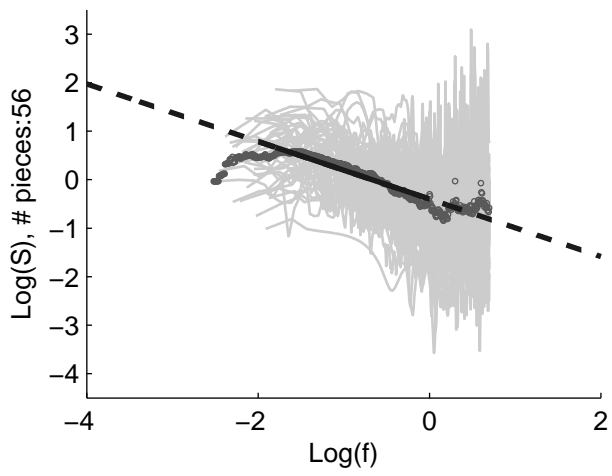

$\mu$  original: 0.645

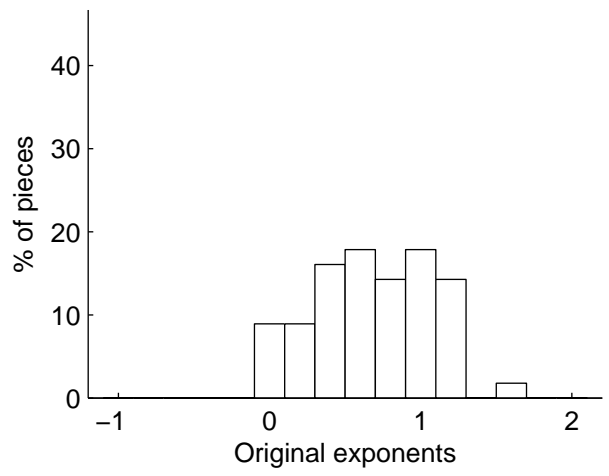

Shuffled spectra

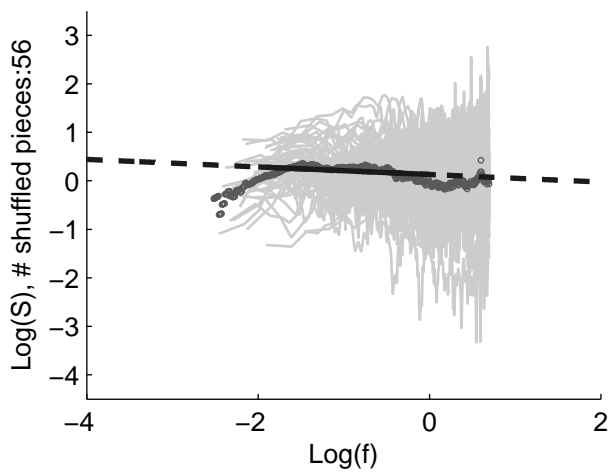

$\mu$  shuffled: 0.142

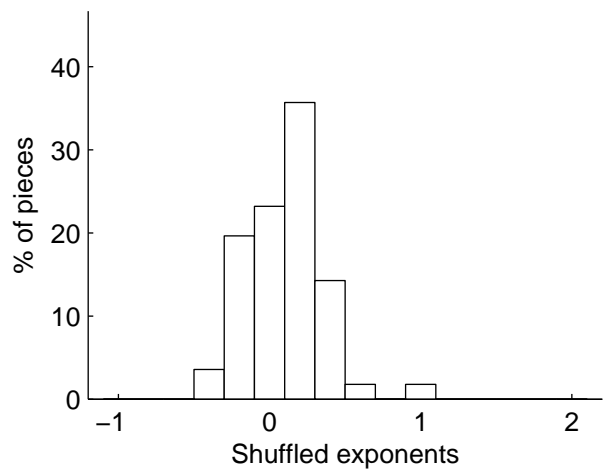

Original > Shuffled:  $p < 0.000$

Genre: quartet

Original spectra

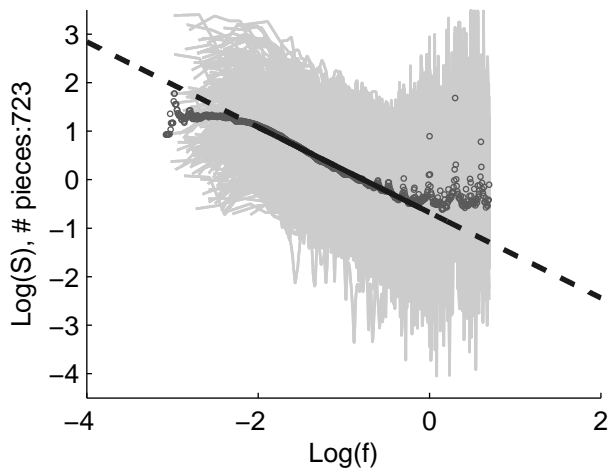

$\mu$  original: 0.862

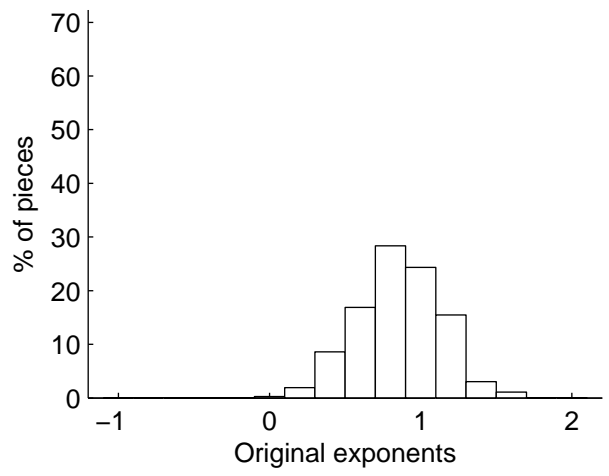

Shuffled spectra

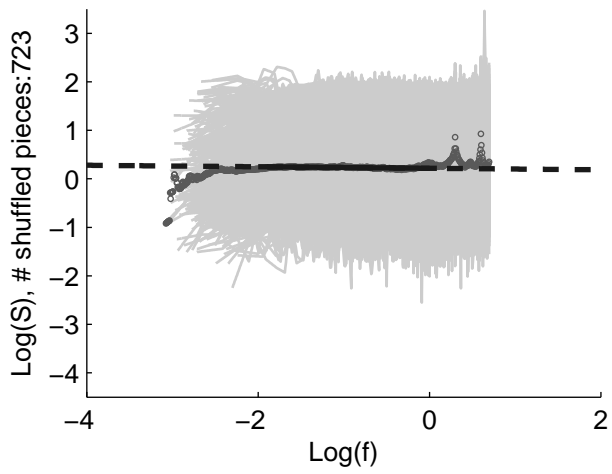

$\mu$  shuffled: 0.011

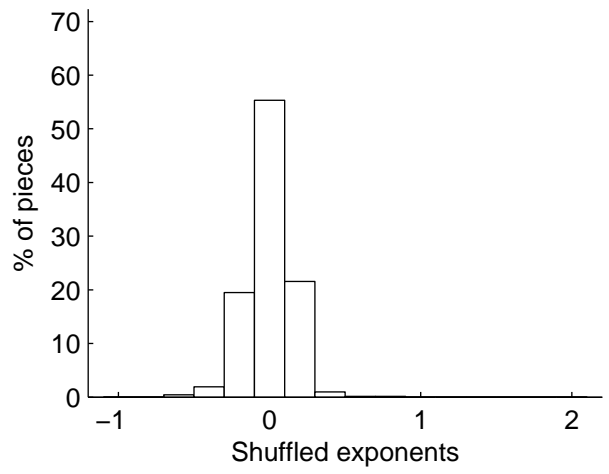

Original > Shuffled:  $p < 0.000$

**Genre:ragtime**

Original spectra

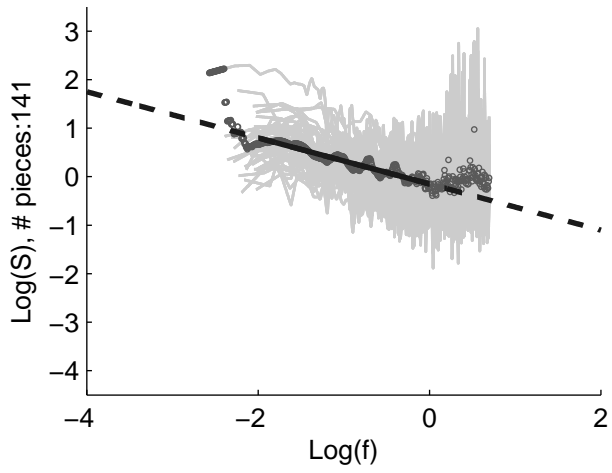

$\mu$  original: 0.498

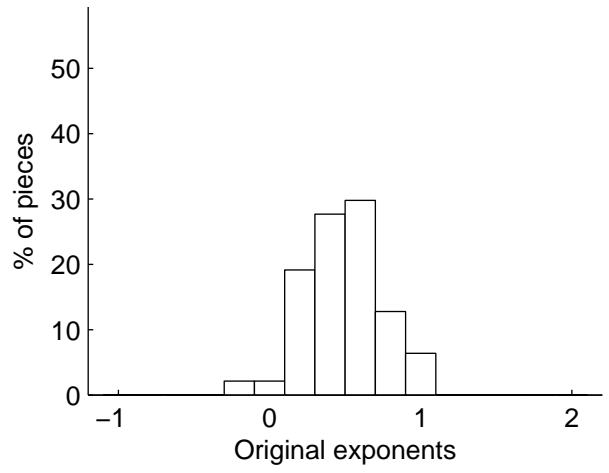

Shuffled spectra

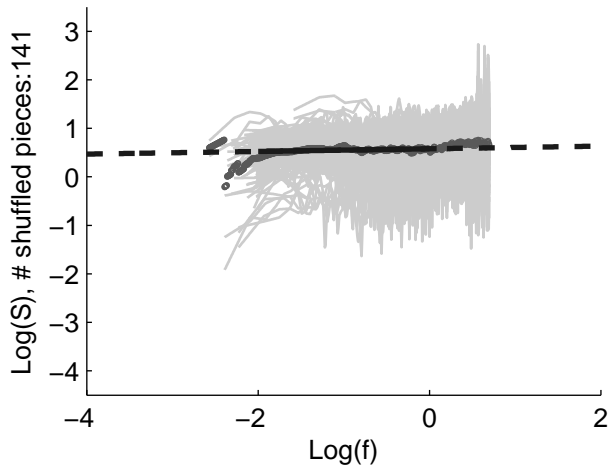

$\mu$  shuffled: -0.015

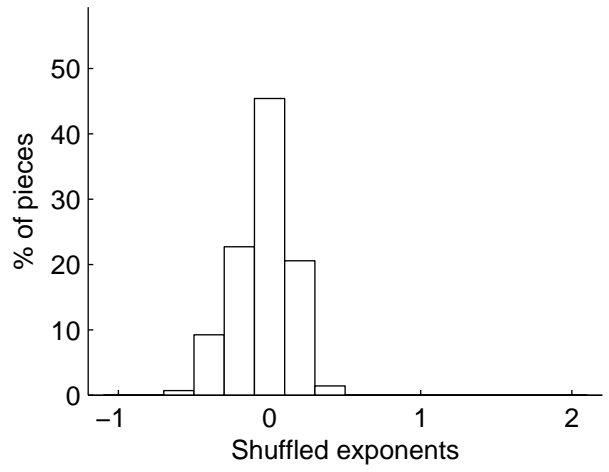

Original > Shuffled:  $p < 0.000$

**Genre:scherzo**

Original spectra

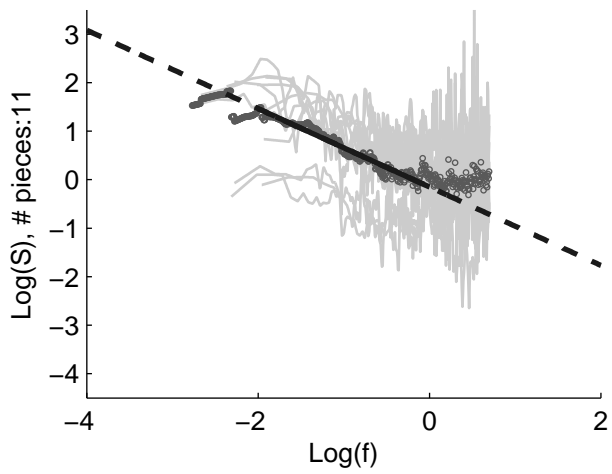

$\mu$  original: 0.820

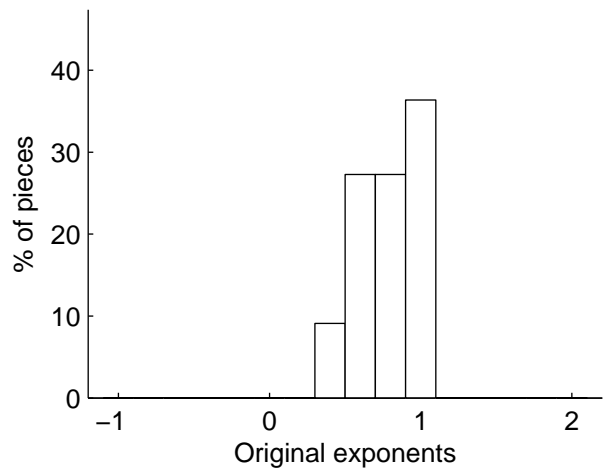

Shuffled spectra

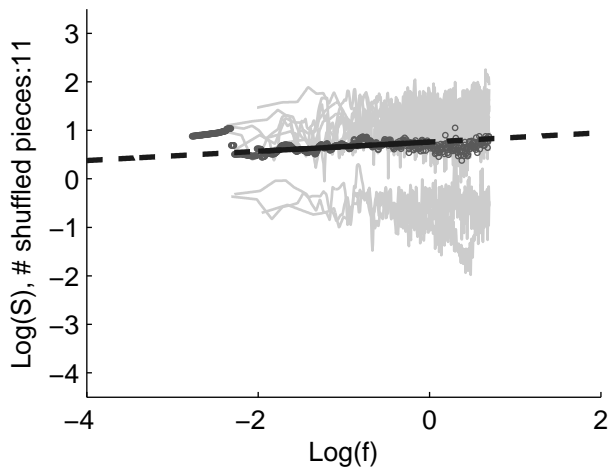

$\mu$  shuffled: -0.054

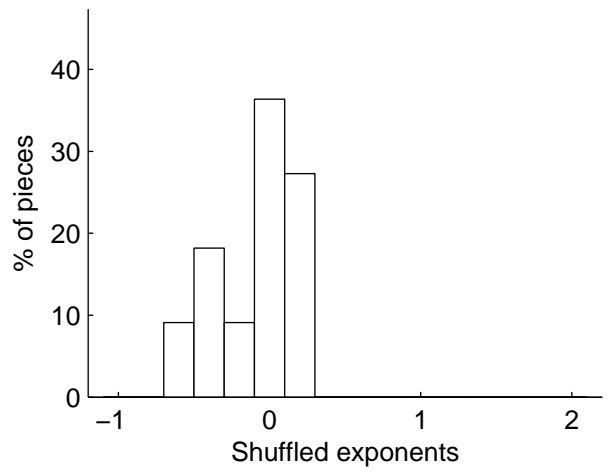

Original > Shuffled:  $p < 0.001$

Genre:sonata

Original spectra

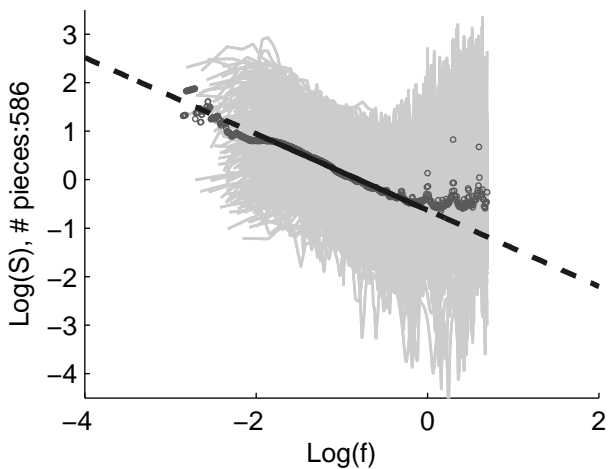

$\mu$  original: 0.770

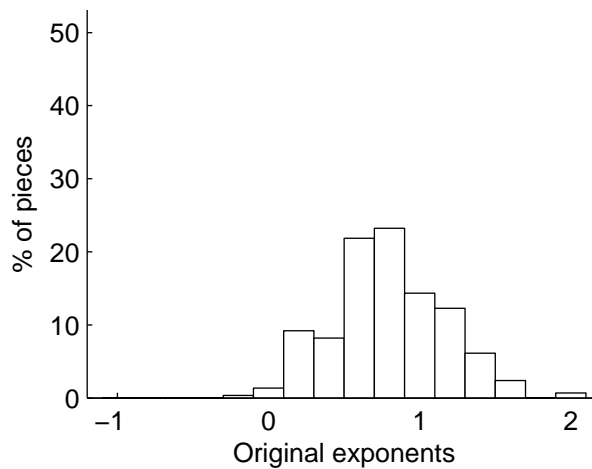

Shuffled spectra

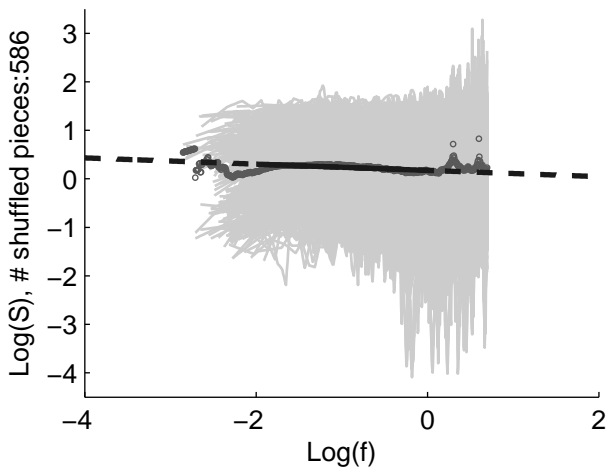

$\mu$  shuffled: 0.049

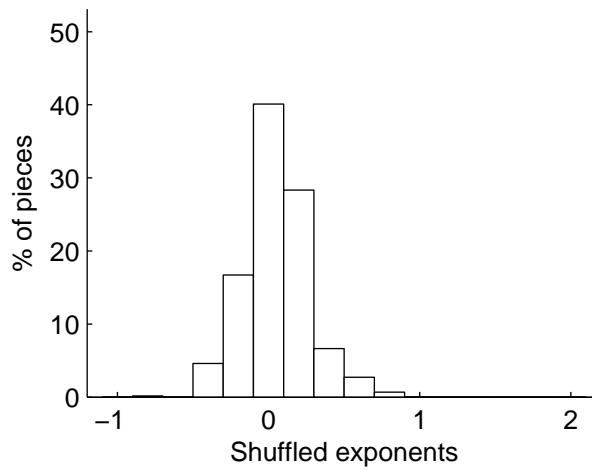

Original > Shuffled:  $p < 0.000$

**Genre:sonatina**

Original spectra

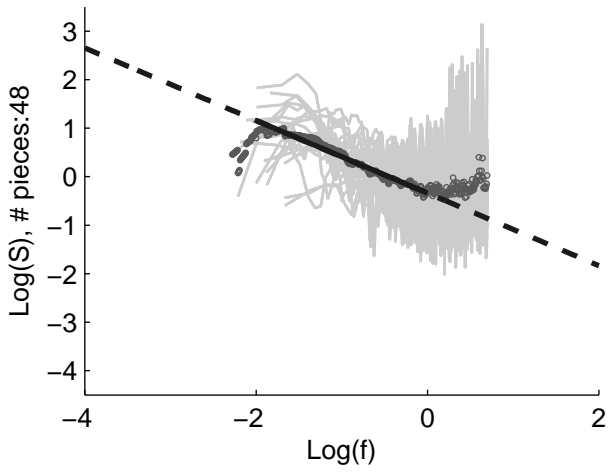

$\mu$  original: 0.770

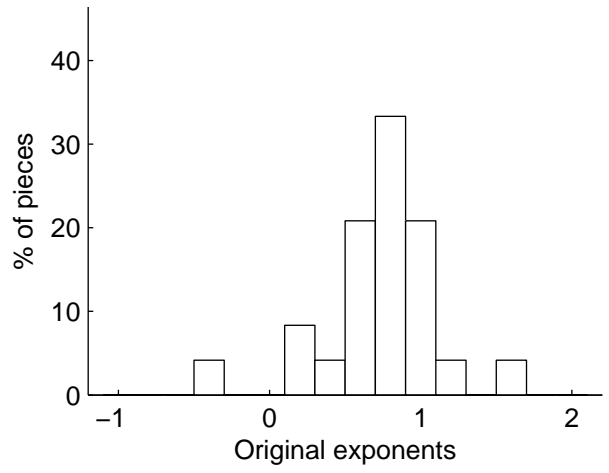

Shuffled spectra

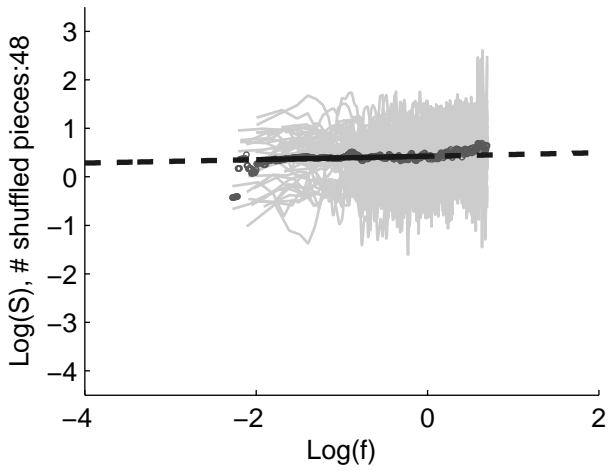

$\mu$  shuffled: -0.023

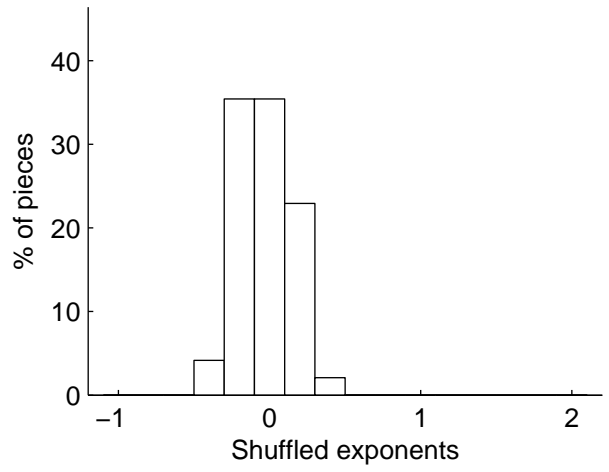

Original > Shuffled:  $p < 0.000$

**Genre:symphony**

Original spectra

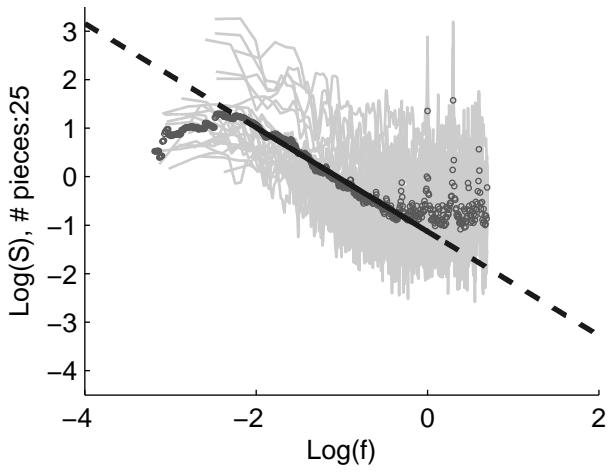

$\mu$  original: 1.025

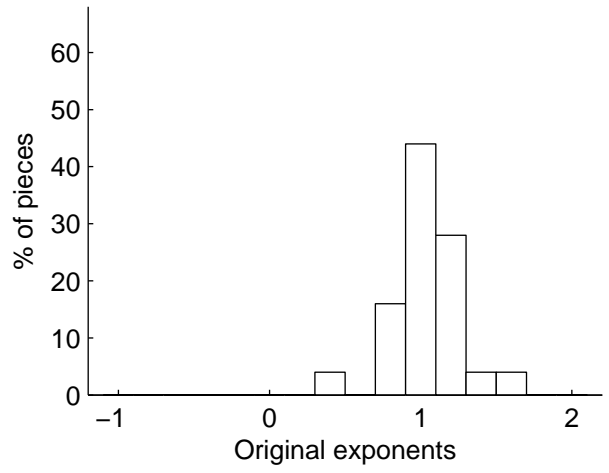

Shuffled spectra

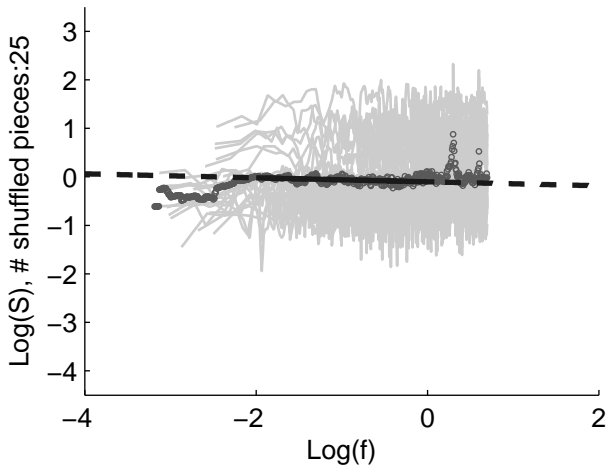

$\mu$  shuffled: -0.002

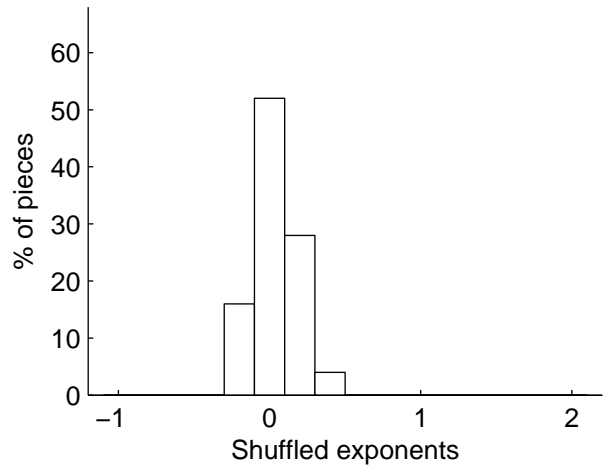

Original > Shuffled:  $p < 0.000$

**Genre:waltz**

Original spectra

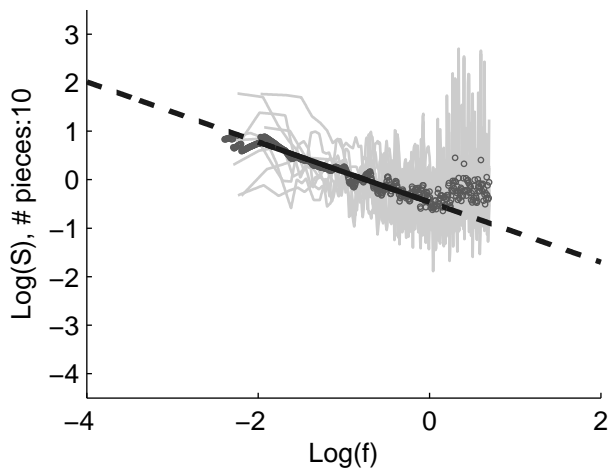

$\mu$  original: 0.682

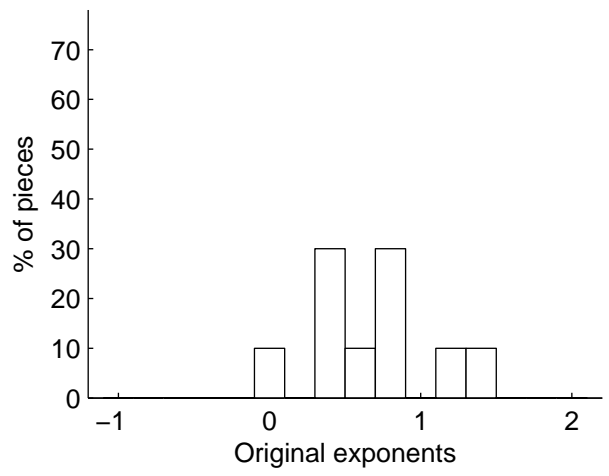

Shuffled spectra

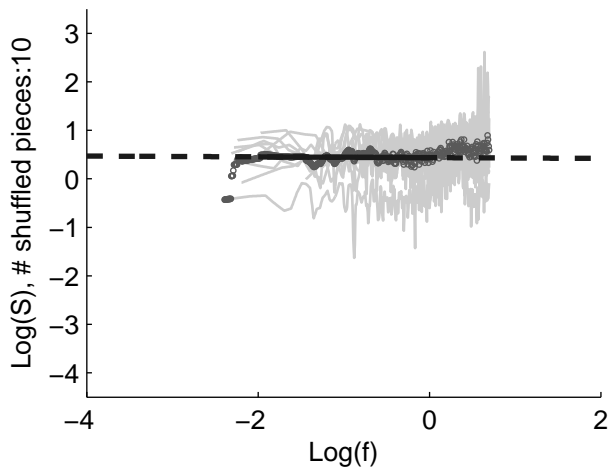

$\mu$  shuffled: -0.006

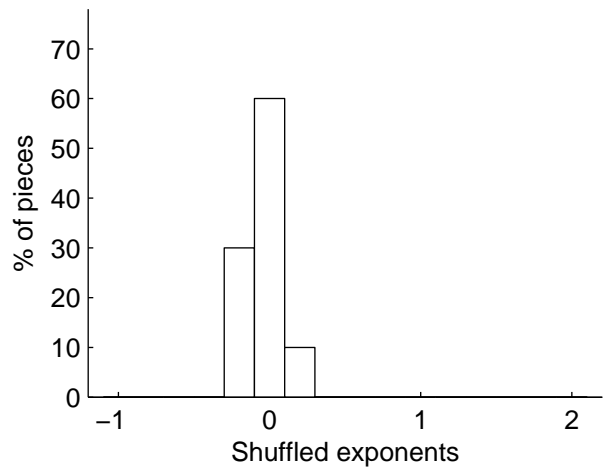

Original > Shuffled:  $p < 0.004$
