# Supplementary material
Source: PubMed Central journal article supplement (PMC3309746)
Supplement: 1113828109_sapp02.pdf [file 1113828109_sapp02.pdf]

**Composer: Bach**

Original spectra

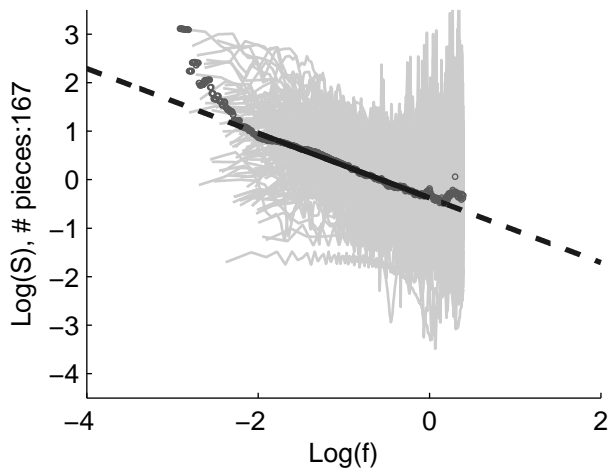

$\mu$  original: 0.708

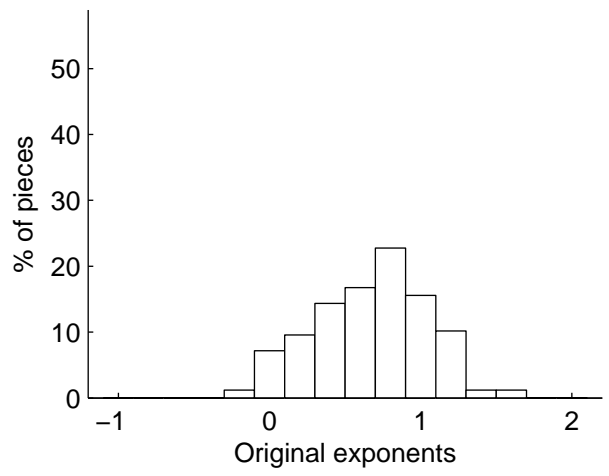

Shuffled spectra

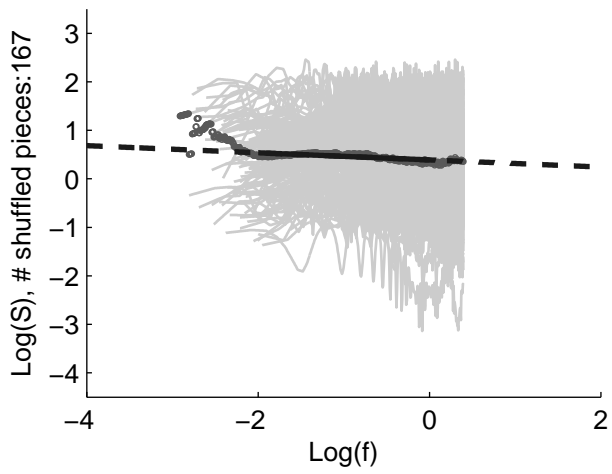

$\mu$  shuffled: 0.049

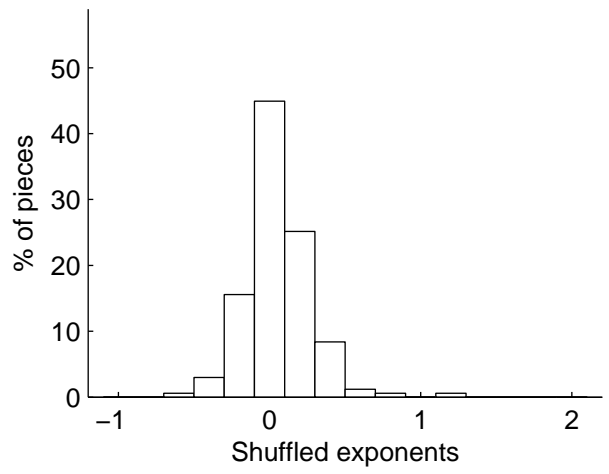

Original > Shuffled:  $p < 0.000$

**Composer:Beethoven**

Original spectra

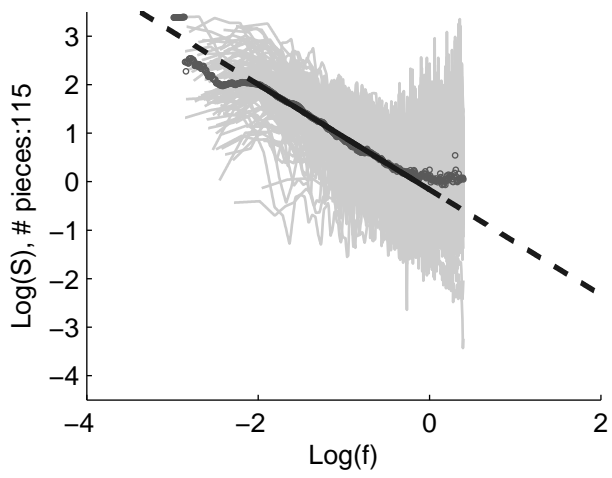

$\mu$  original: 1.059

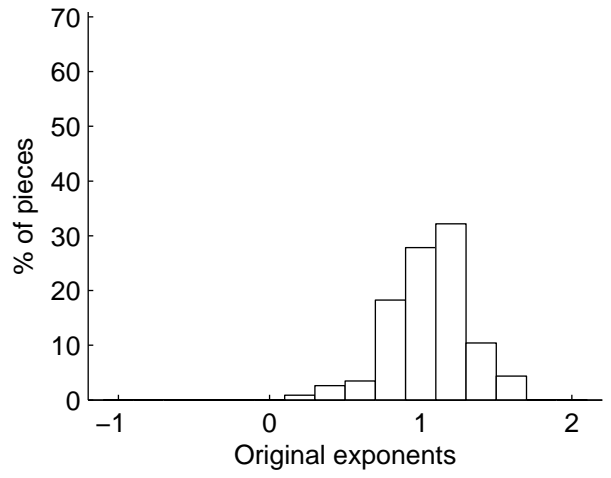

Shuffled spectra

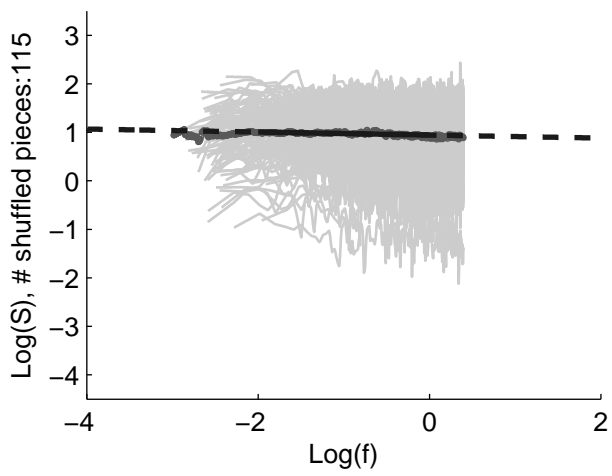

$\mu$  shuffled: 0.013

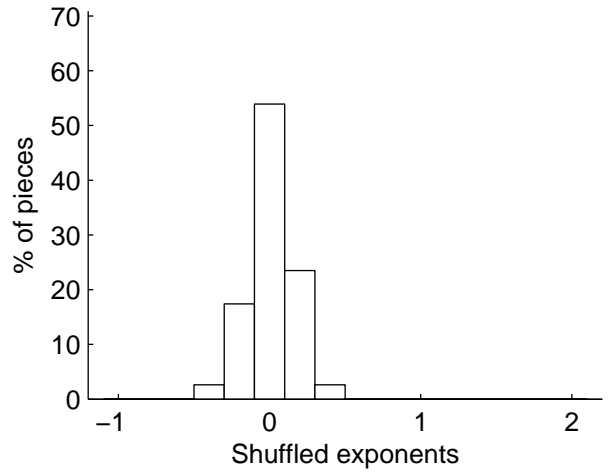

Original > Shuffled:  $p < 0.000$

**Composer: Brahms**

Original spectra

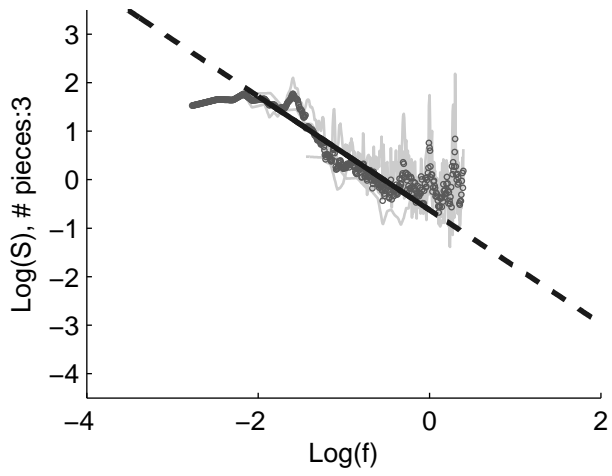

$\mu$  original: 1.177

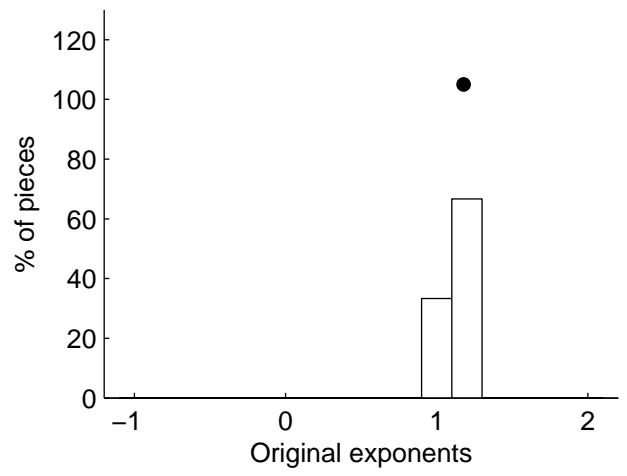

Shuffled spectra

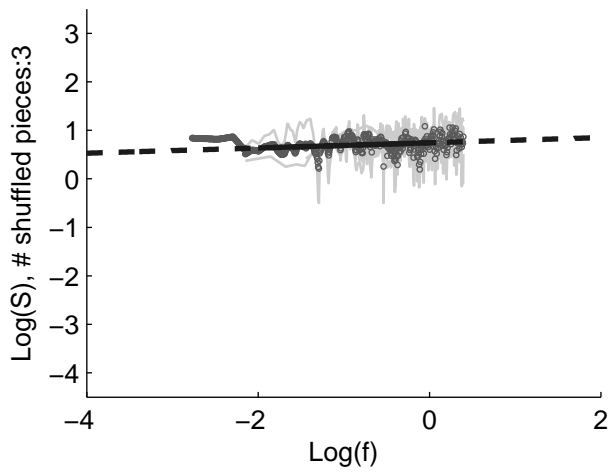

$\mu$  shuffled: -0.040

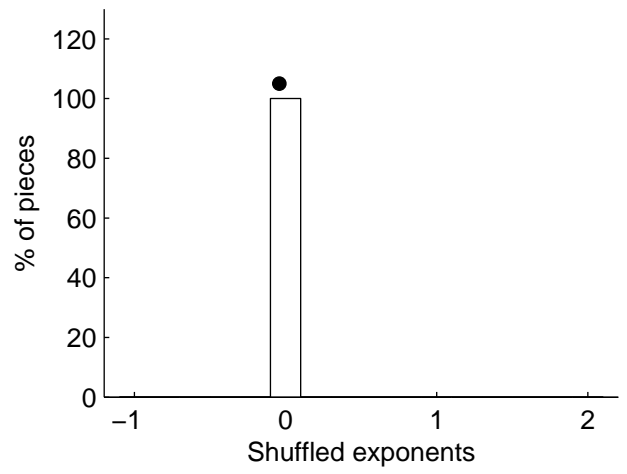

Original > Shuffled:  $p < 0.250$

**Composer: Buxtehude**

Original spectra

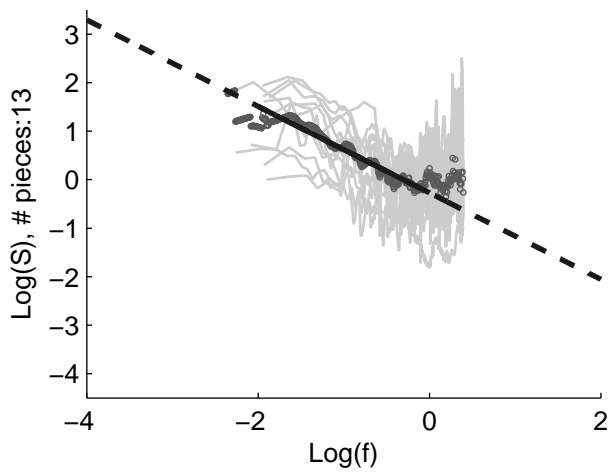

$\mu$  original: 0.924

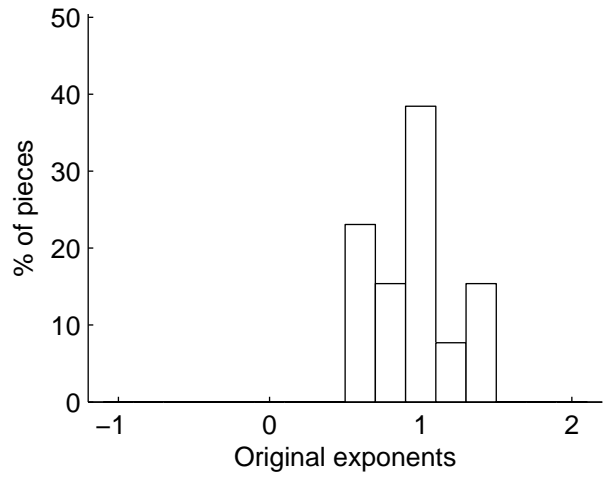

Shuffled spectra

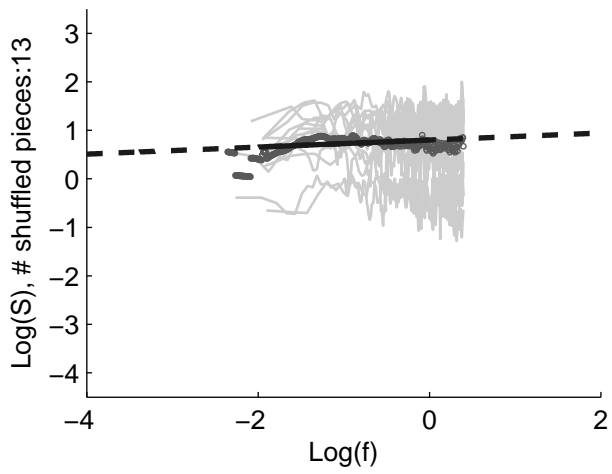

$\mu$  shuffled: -0.068

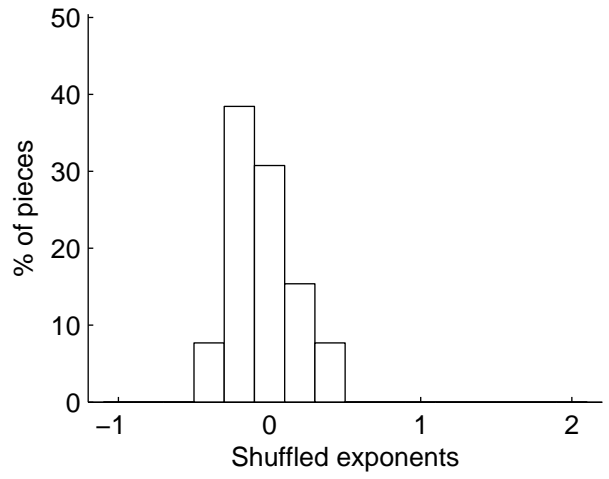

Original > Shuffled:  $p < 0.000$

**Composer:Byrd**

Original spectra

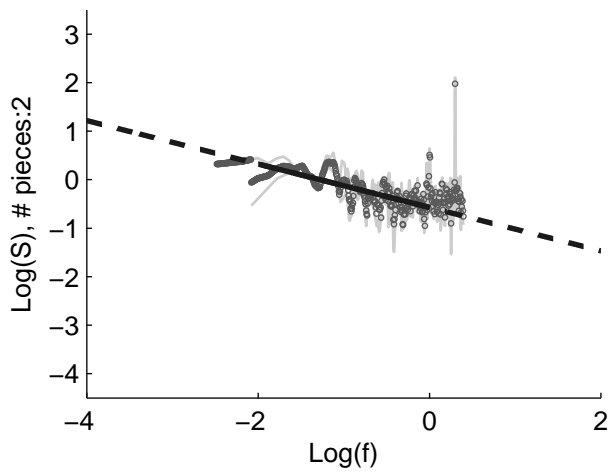

$\mu$  original: 0.436

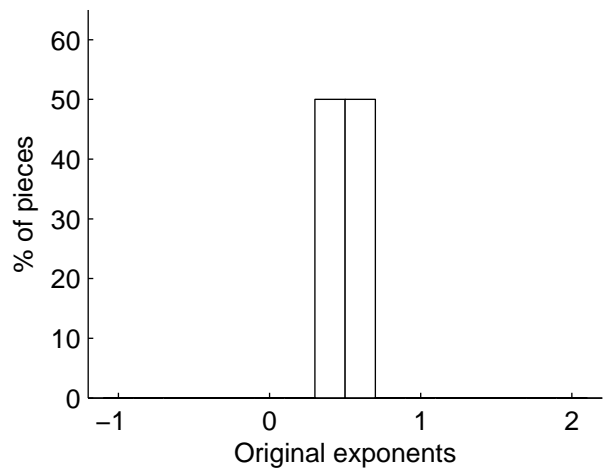

Shuffled spectra

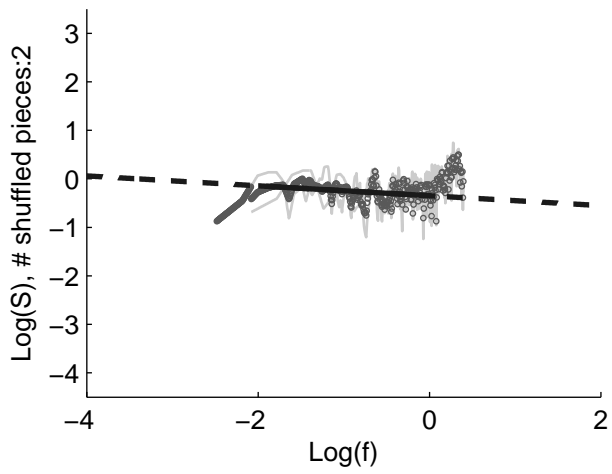

$\mu$  shuffled: 0.110

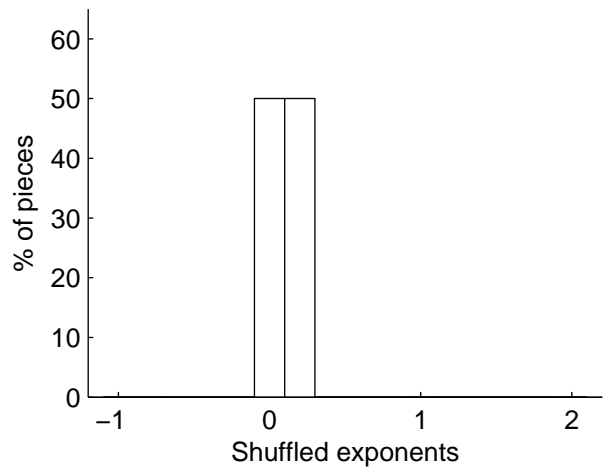

Original > Shuffled:  $p < 0.500$

**Composer:Chopin**

Original spectra

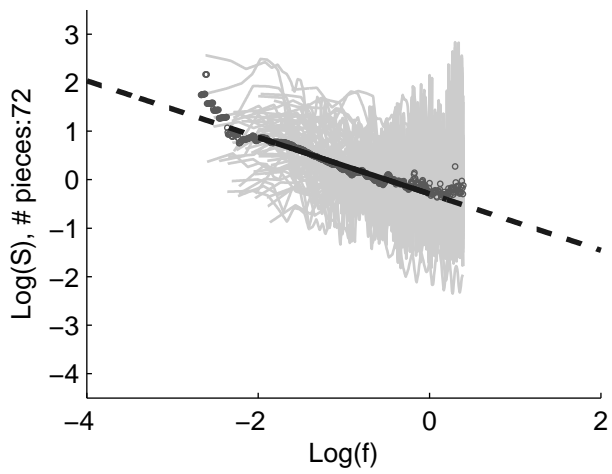

$\mu$  original: 0.662

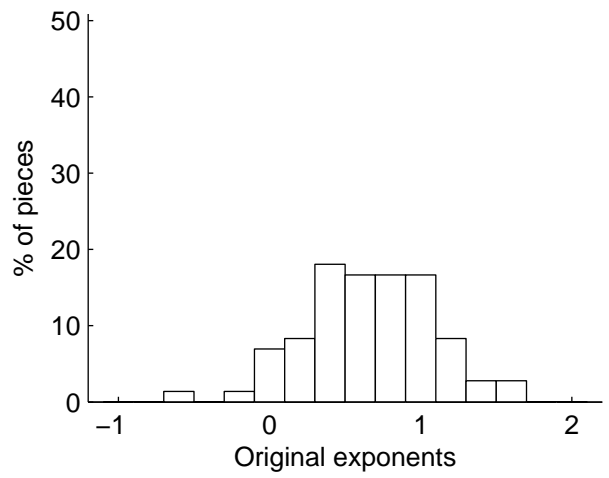

Shuffled spectra

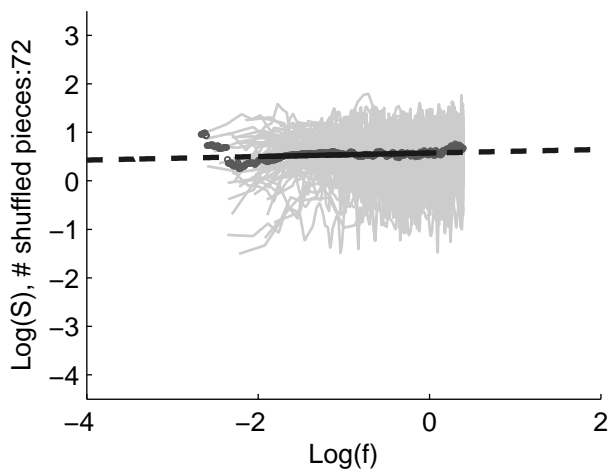

$\mu$  shuffled: -0.031

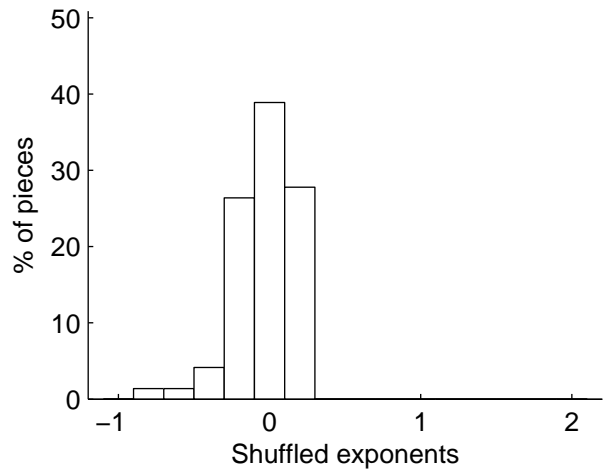

Original > Shuffled:  $p < 0.000$

**Composer: Clementi**

Original spectra

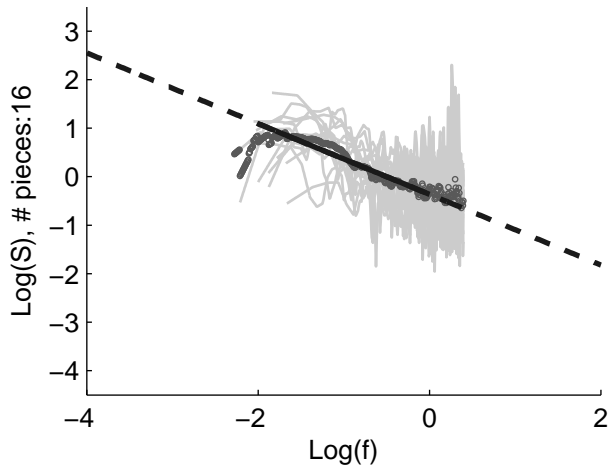

$\mu$  original: 0.782

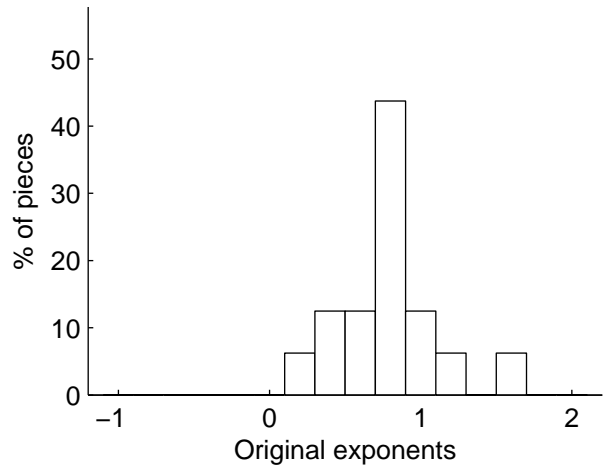

Shuffled spectra

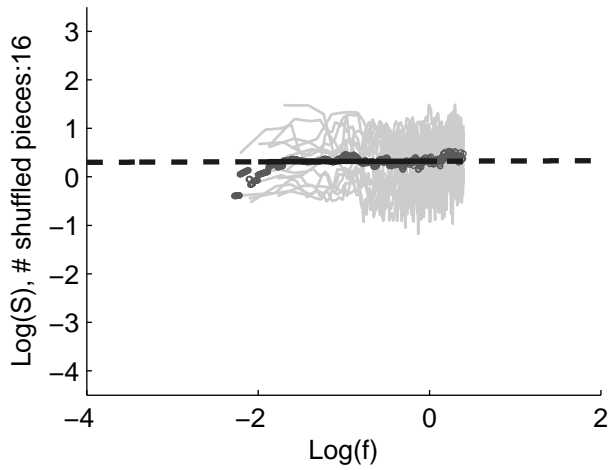

$\mu$  shuffled: -0.015

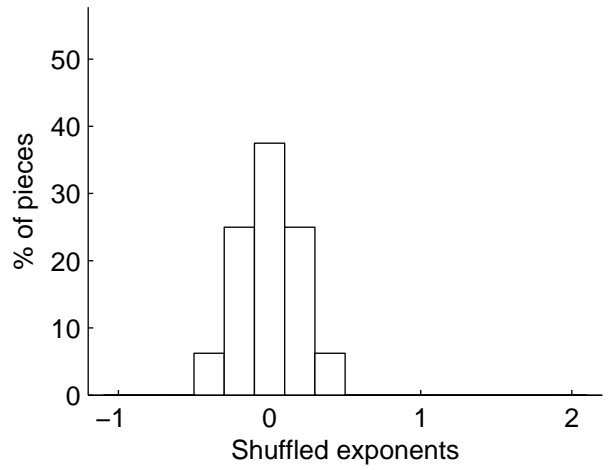

Original > Shuffled:  $p < 0.000$

**Composer: Corelli**

Original spectra

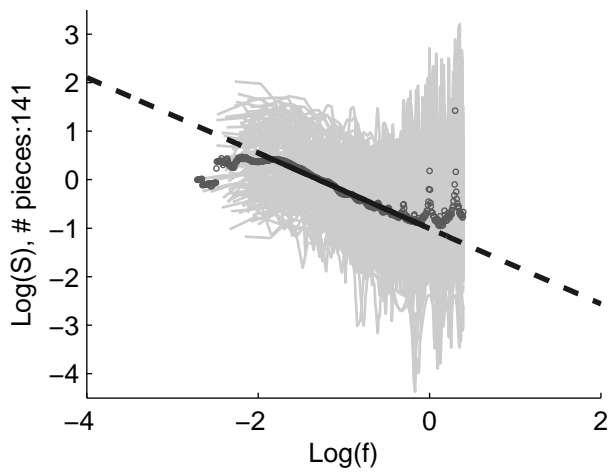

$\mu$  original: 0.733

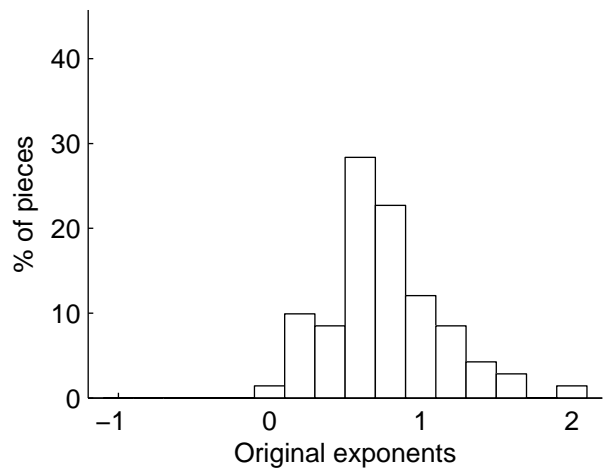

Shuffled spectra

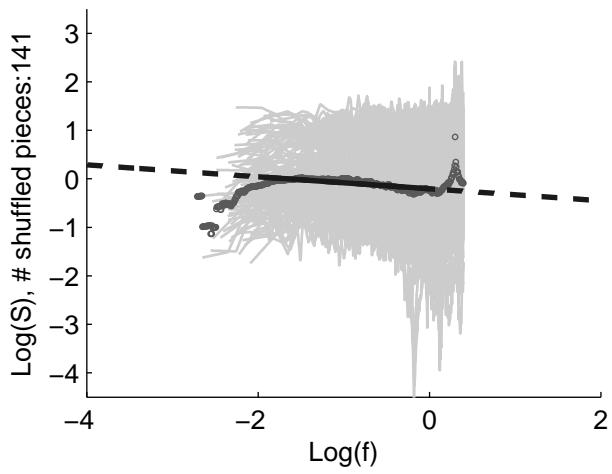

$\mu$  shuffled: 0.091

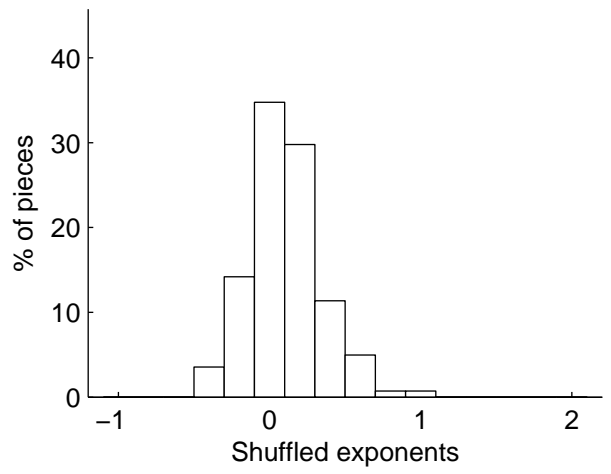

Original > Shuffled:  $p < 0.000$



**Composer:Dufay**

Original spectra

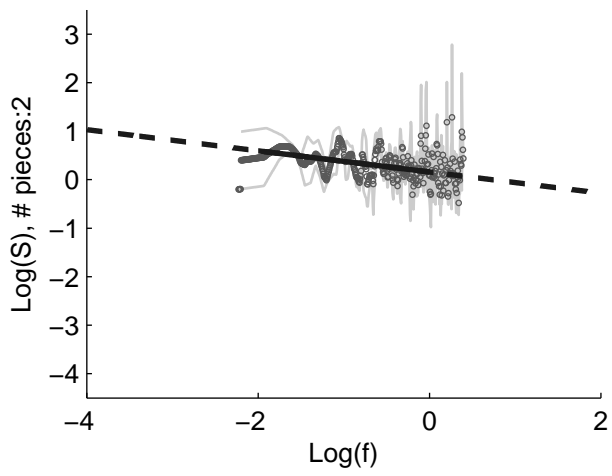

$\mu$  original: 0.214

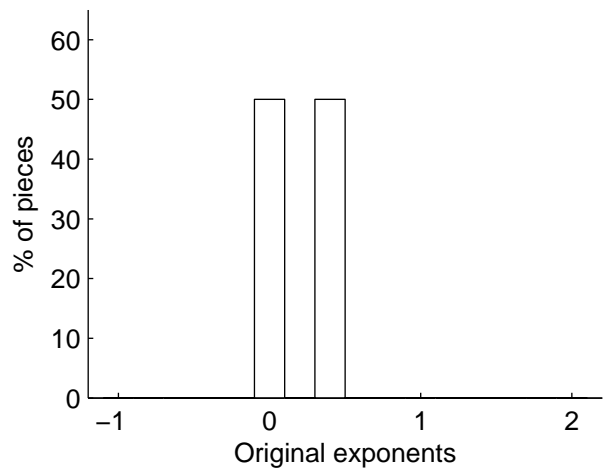

Shuffled spectra

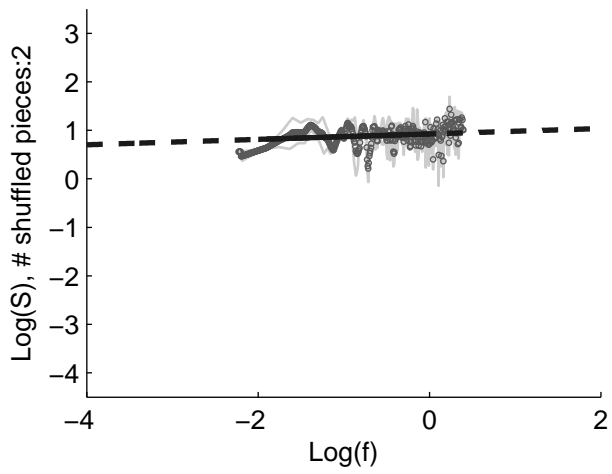

$\mu$  shuffled: -0.060

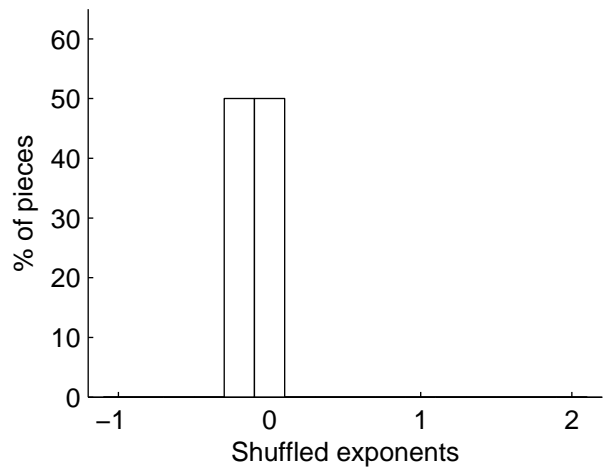

Original > Shuffled:  $p < 0.500$

**Composer: Dunstable**

Original spectra

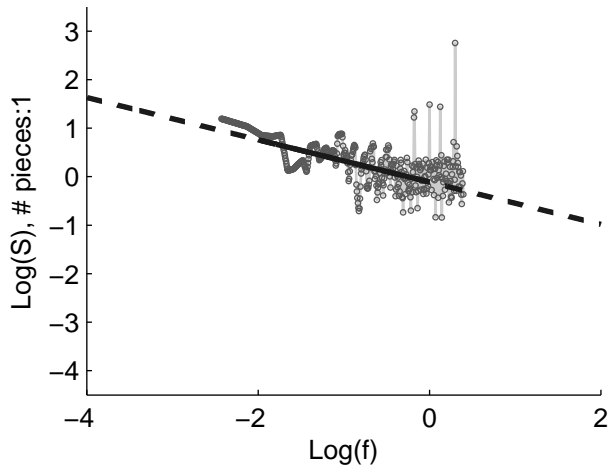

$\mu$  original: 0.436

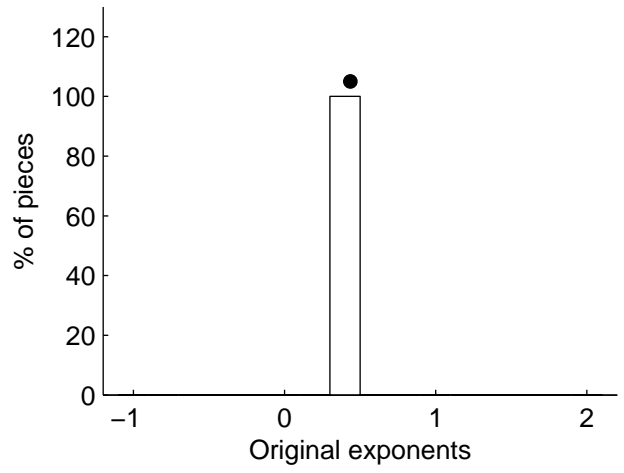

Shuffled spectra

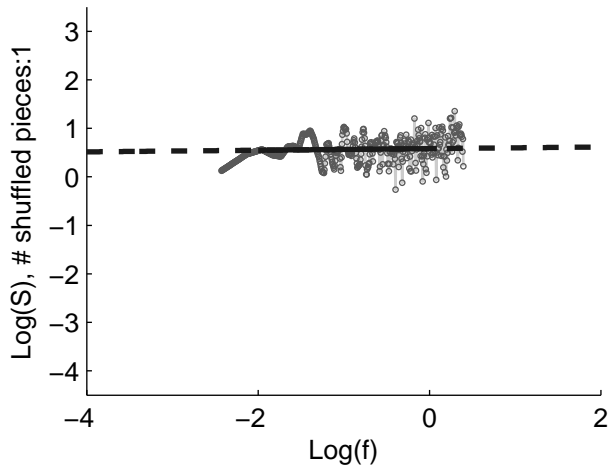

$\mu$  shuffled: -0.017

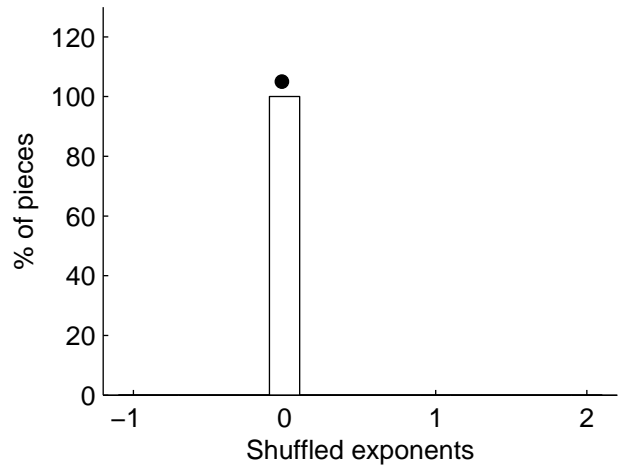

Original > Shuffled:  $p < 1.000$

**Composer:Field**

Original spectra

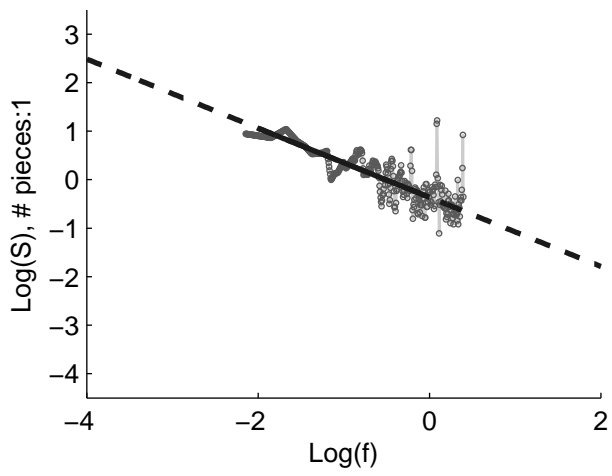

$\mu$  original: 0.712

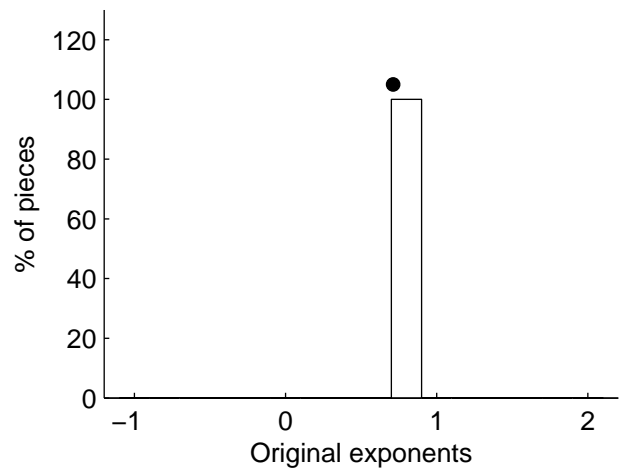

Shuffled spectra

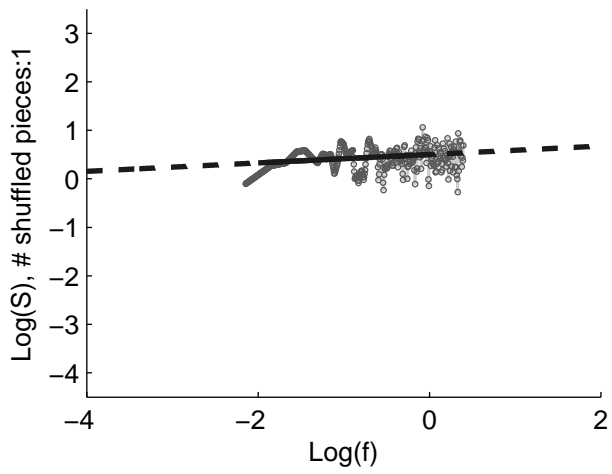

$\mu$  shuffled: -0.087

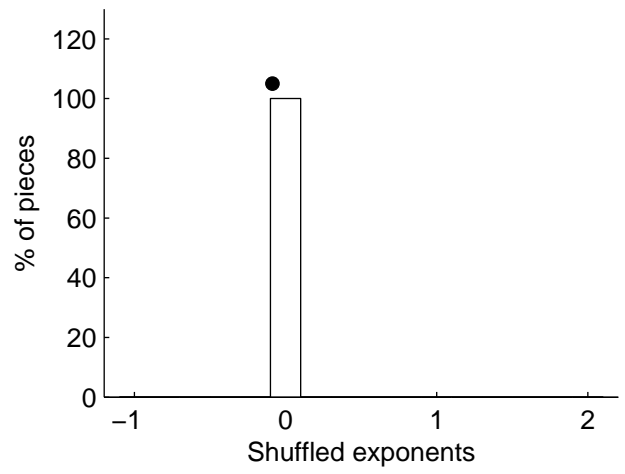

Original > Shuffled:  $p < 1.000$

**Composer:Flecha**

Original spectra

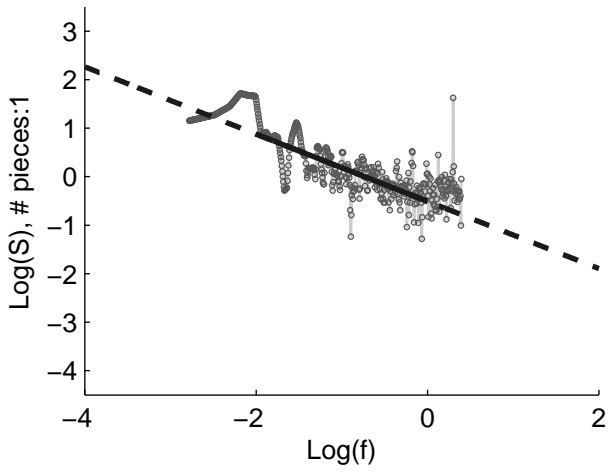

$\mu$  original: 0.693

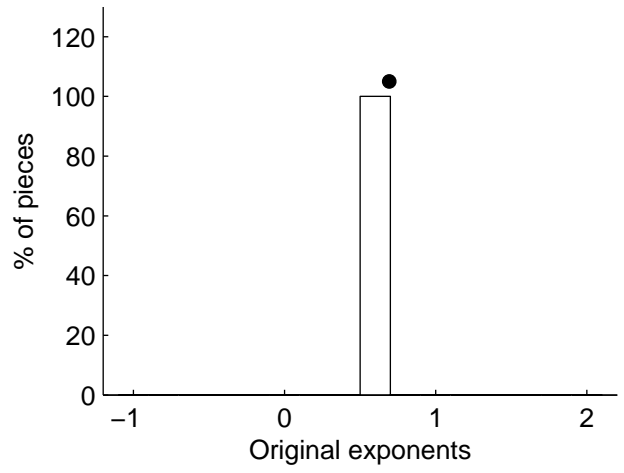

Shuffled spectra

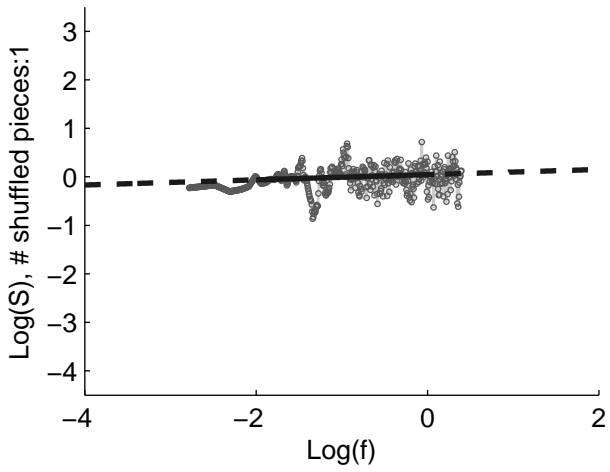

$\mu$  shuffled: -0.053

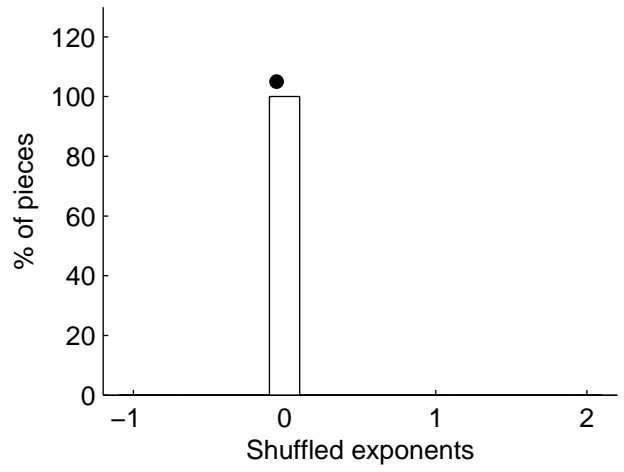

Original > Shuffled:  $p < 1.000$

**Composer:Foster**

Original spectra

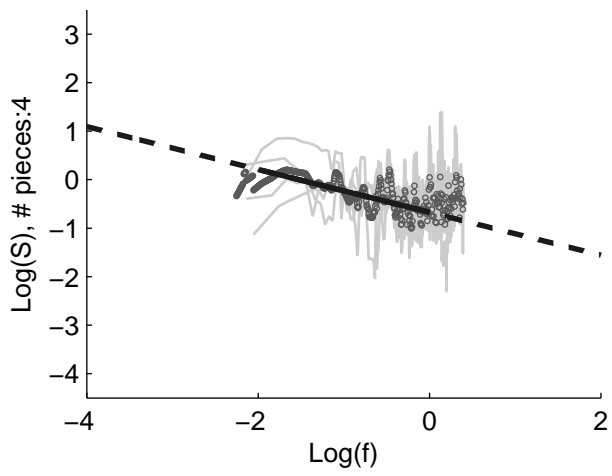

$\mu$  original: 0.432

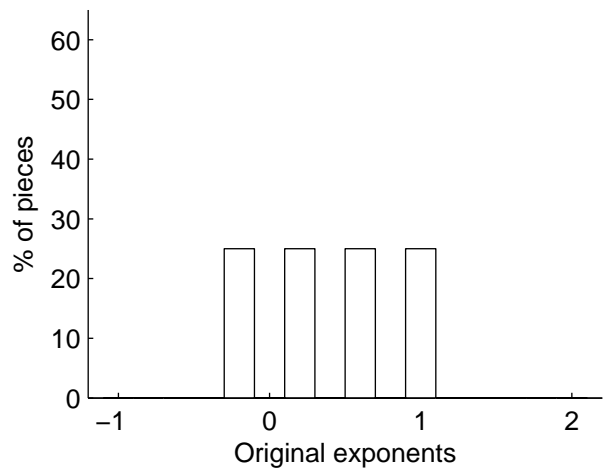

Shuffled spectra

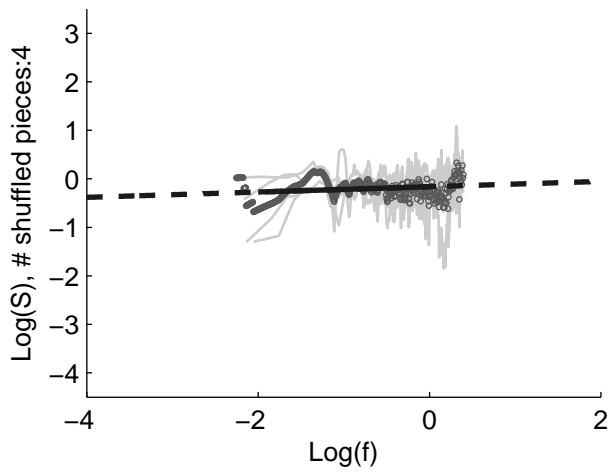

$\mu$  shuffled: -0.025

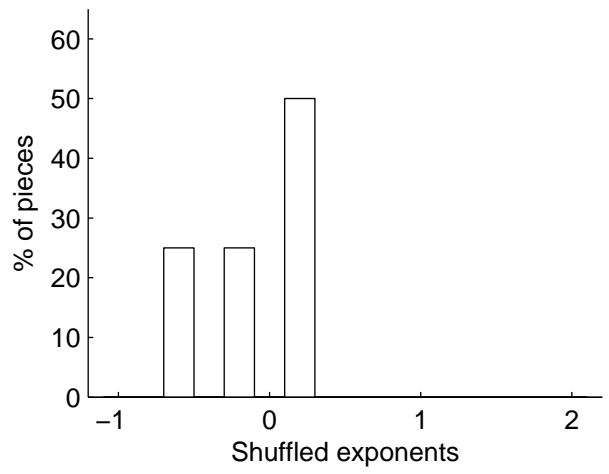

Original > Shuffled:  $p < 0.125$

**Composer:Frescobaldi**

Original spectra

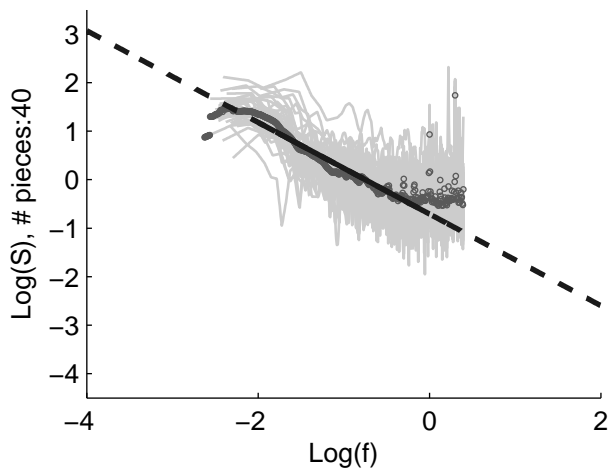

$\mu$  original: 0.944

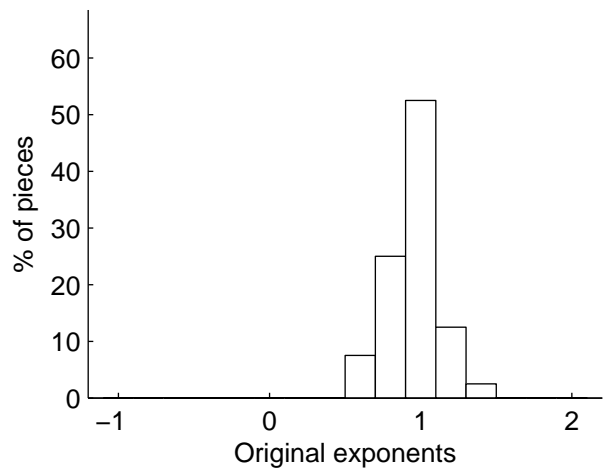

Shuffled spectra

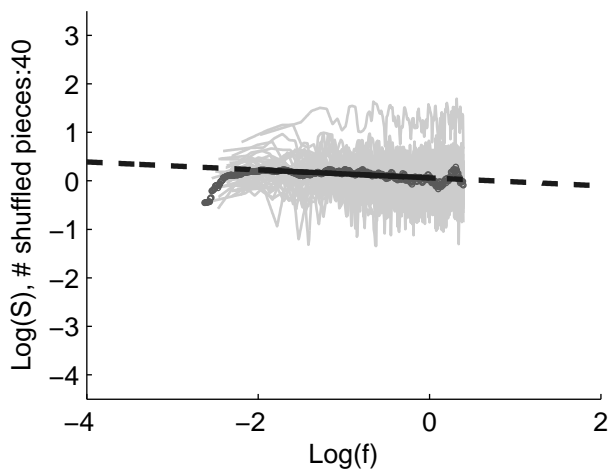

$\mu$  shuffled: 0.069

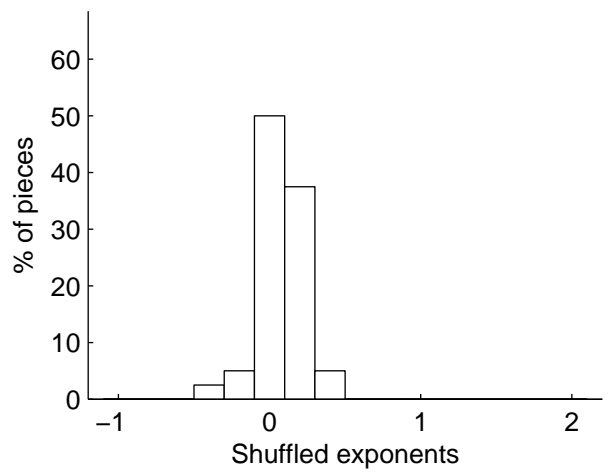

Original > Shuffled:  $p < 0.000$

**Composer:Giovannelli**  
Original spectra

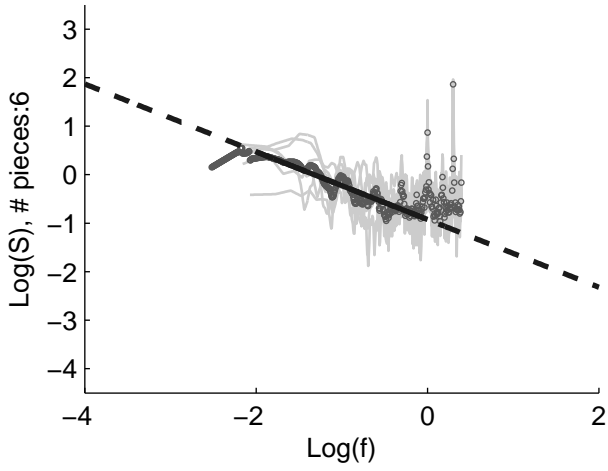

$\mu$  original: 0.809

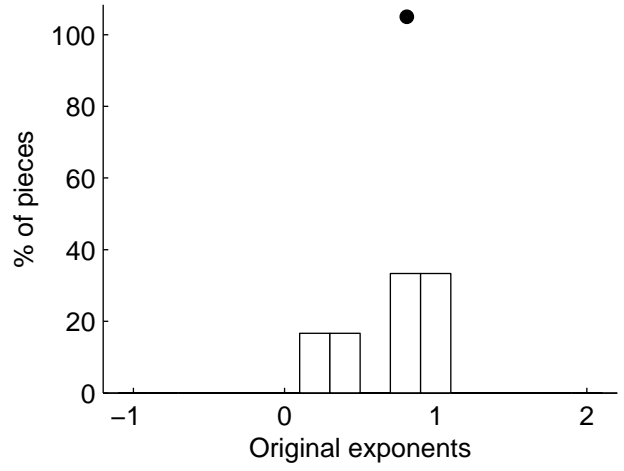

Shuffled spectra

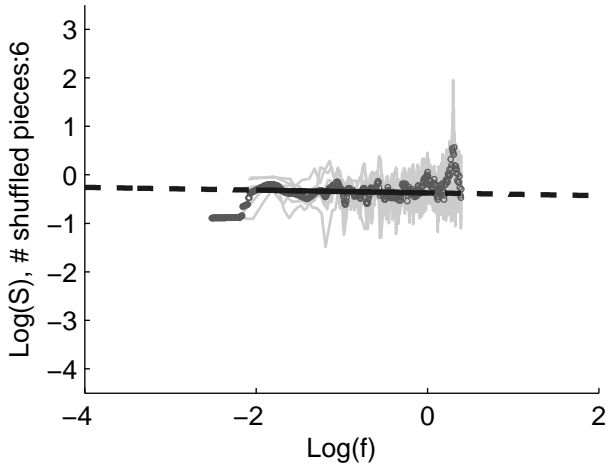

$\mu$  shuffled: 0.000

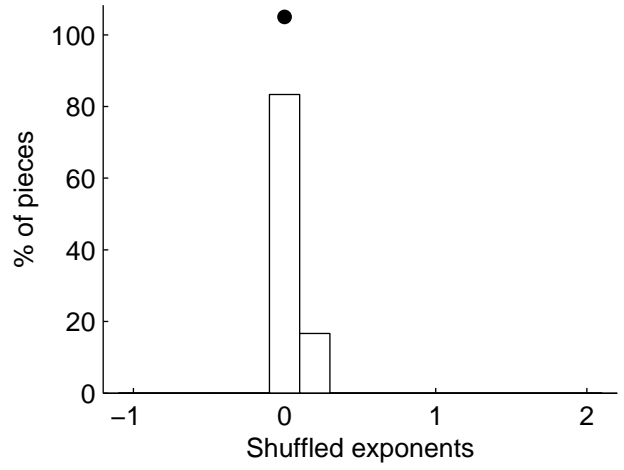

Original > Shuffled:  $p < 0.031$

**Composer: Grieg**

Original spectra

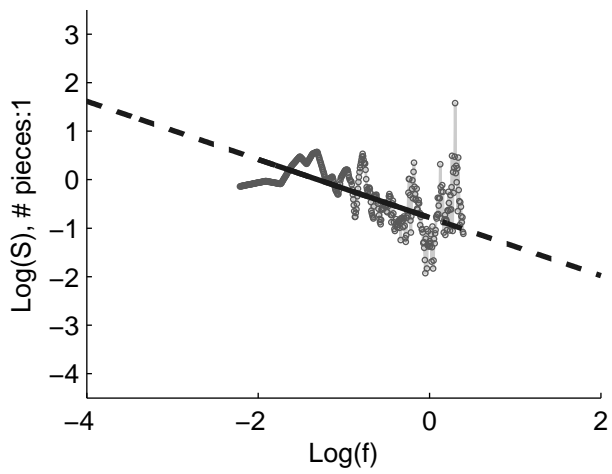

$\mu$  original: 0.599

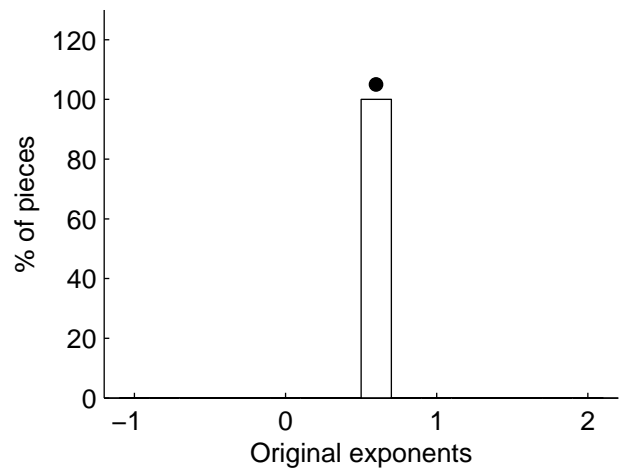

Shuffled spectra

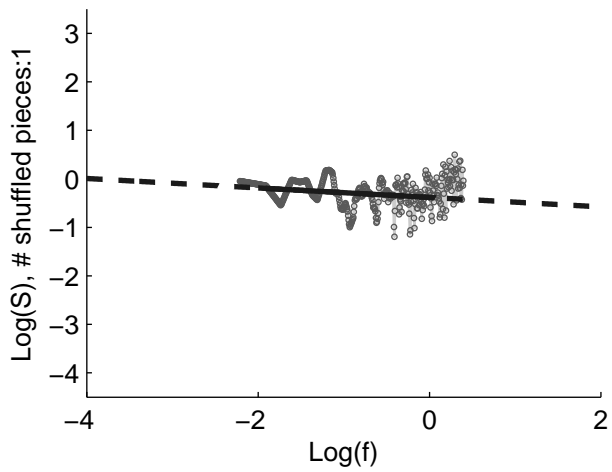

$\mu$  shuffled: 0.098

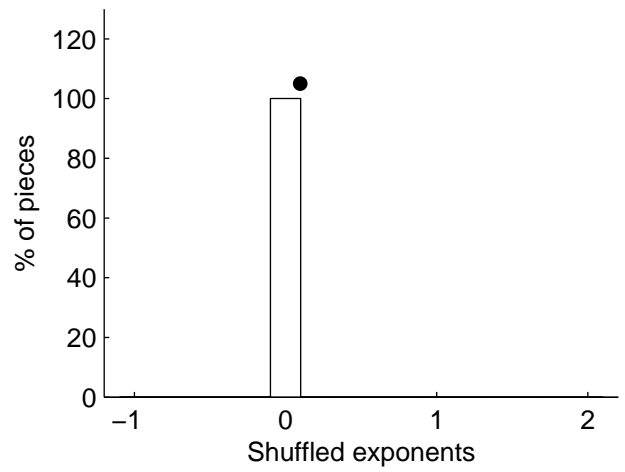

Original > Shuffled:  $p < 1.000$



**Composer:Haydn**

Original spectra

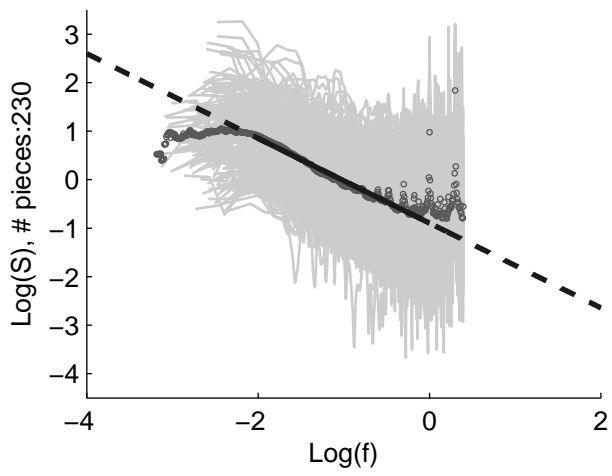

$\mu$  original: 0.851

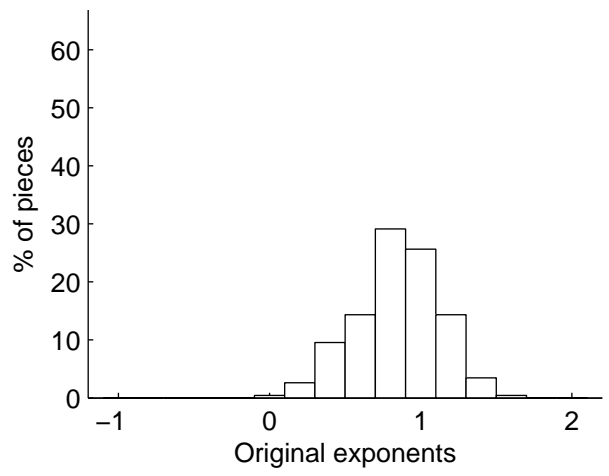

Shuffled spectra

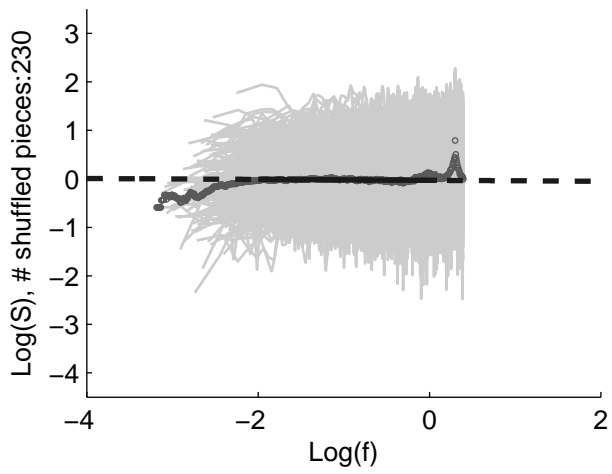

$\mu$  shuffled: -0.006

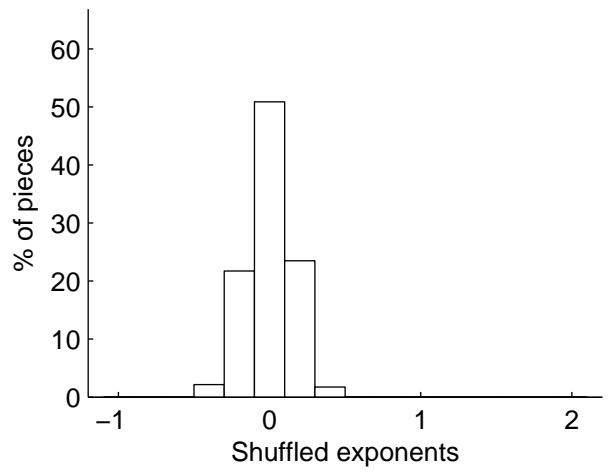

Original > Shuffled:  $p < 0.000$

**Composer:Himmel**

Original spectra

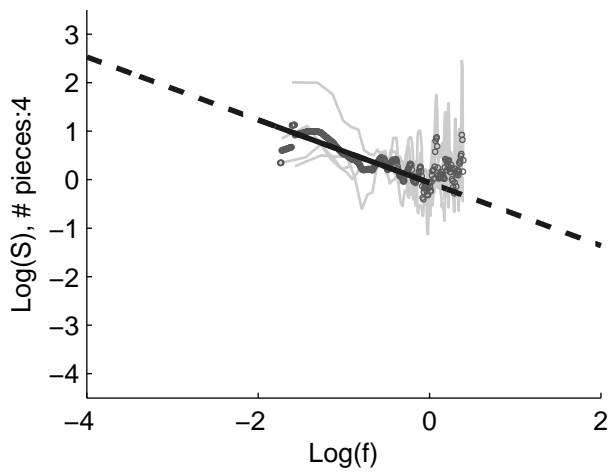

$\mu$  original: 0.561

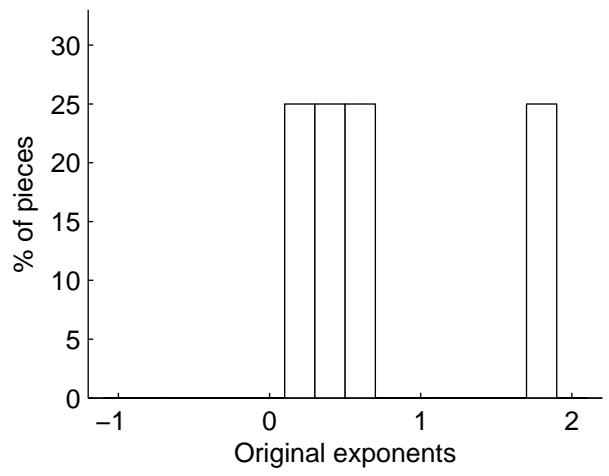

Shuffled spectra

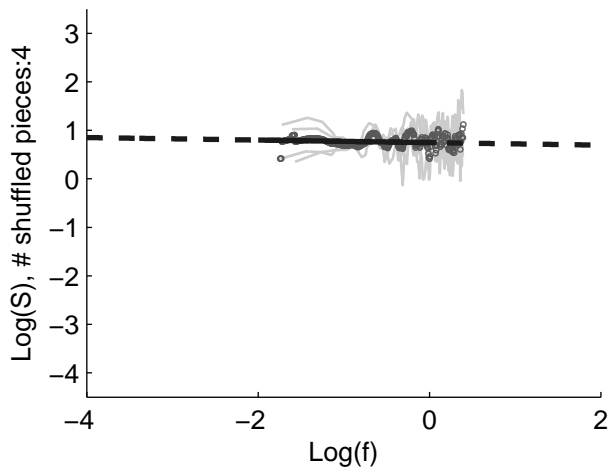

$\mu$  shuffled: -0.132

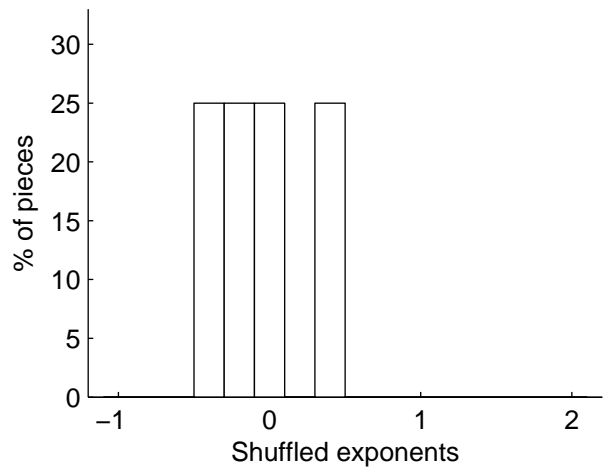

Original > Shuffled:  $p < 0.125$

**Composer: Isaac**

Original spectra

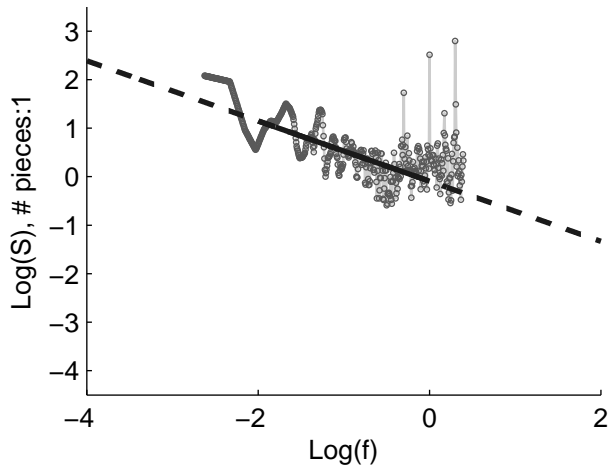

$\mu$  original: 0.620

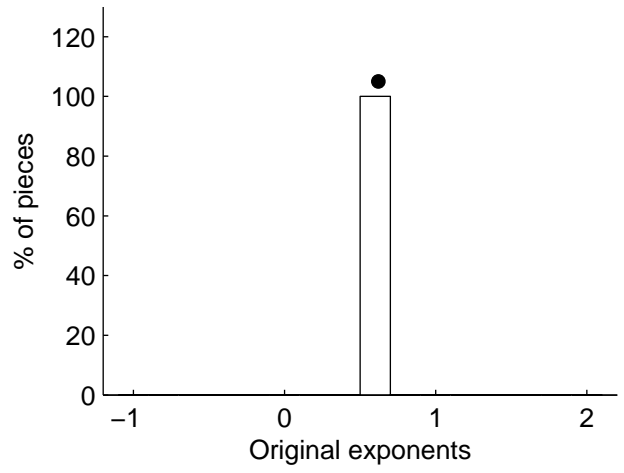

Shuffled spectra

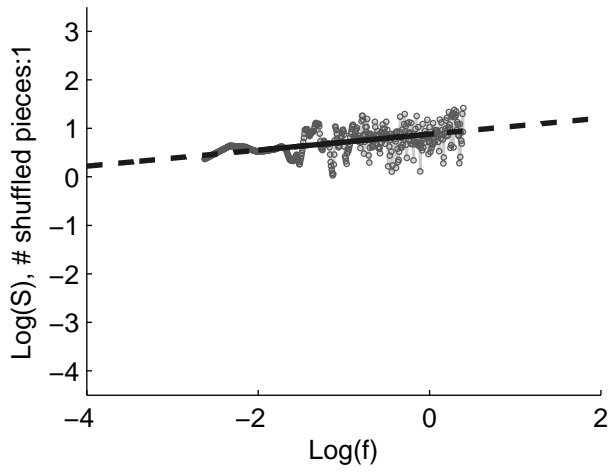

$\mu$  shuffled: -0.165

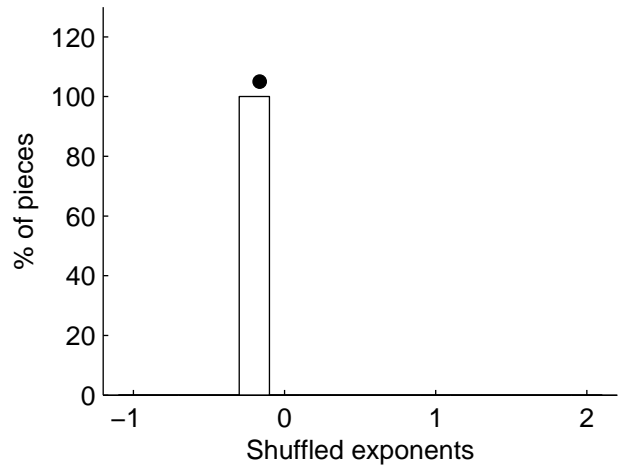

Original > Shuffled:  $p < 1.000$

**Composer: Joplin**

Original spectra

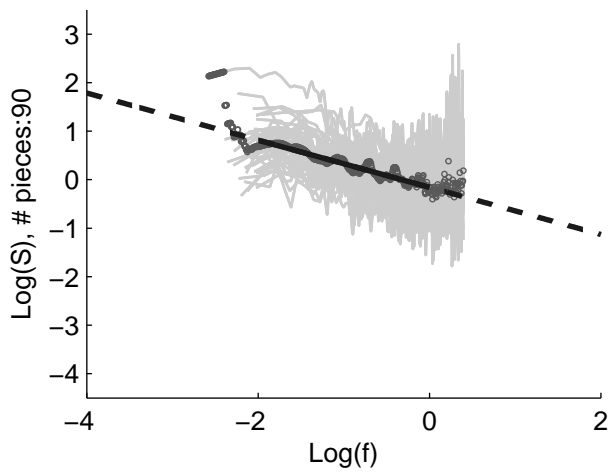

$\mu$  original: 0.499

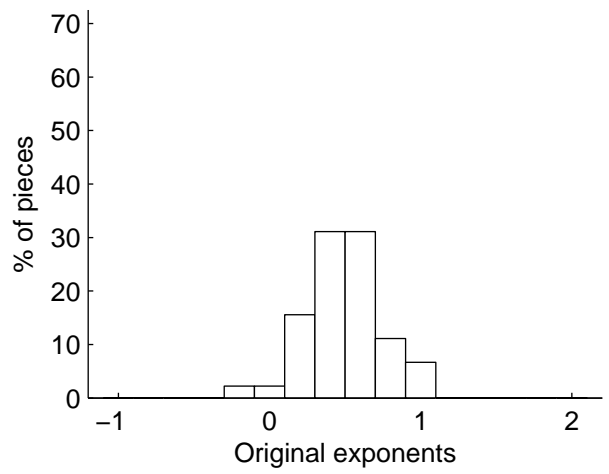

Shuffled spectra

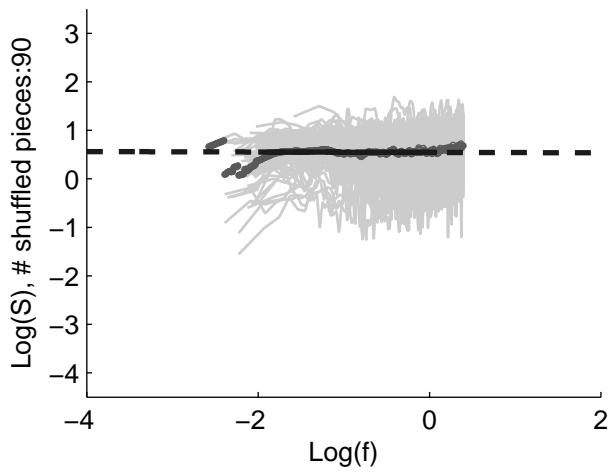

$\mu$  shuffled: -0.026

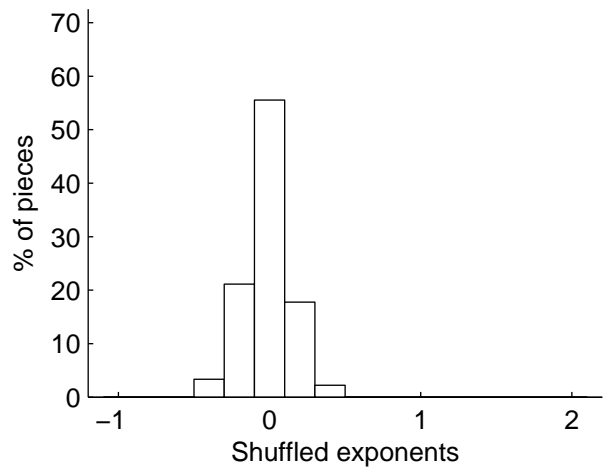

Original > Shuffled:  $p < 0.000$

**Composer: Josquin**

Original spectra

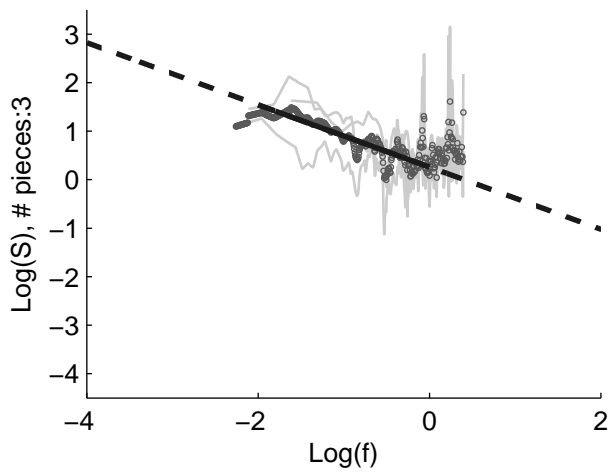

$\mu$  original: 0.814

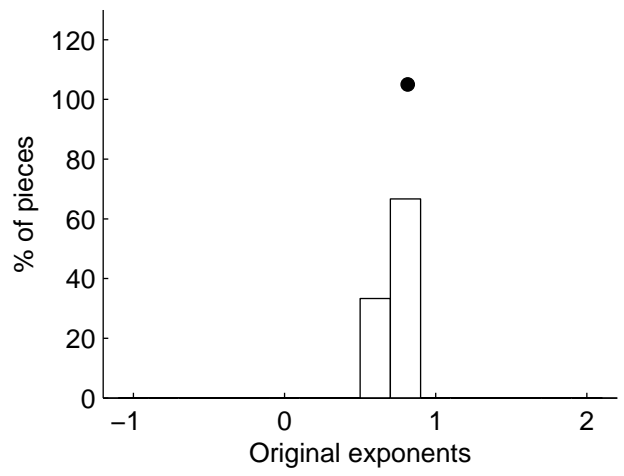

Shuffled spectra

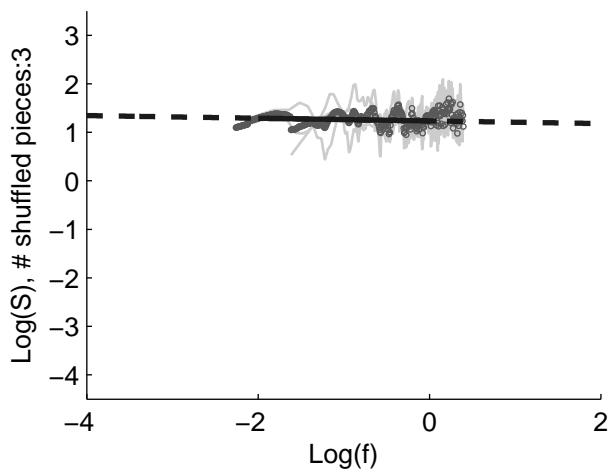

$\mu$  shuffled: -0.014

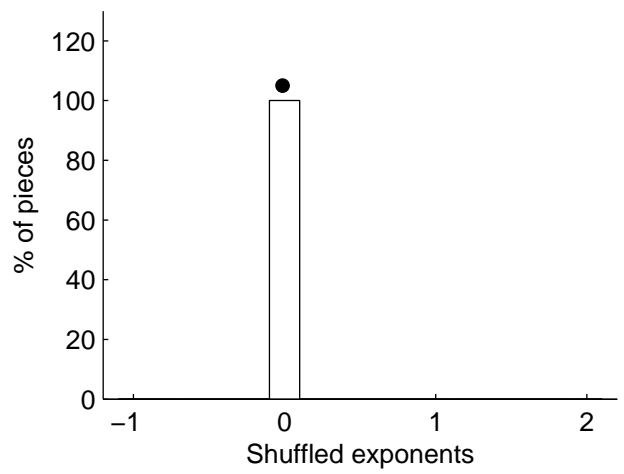

Original > Shuffled:  $p < 0.250$

**Composer:Landini**

Original spectra

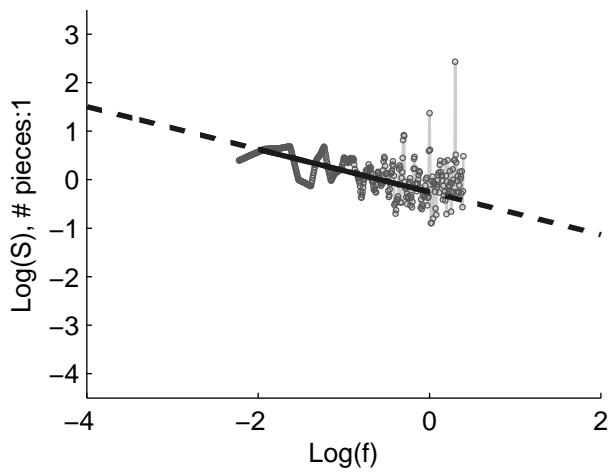

$\mu$  original: 0.440

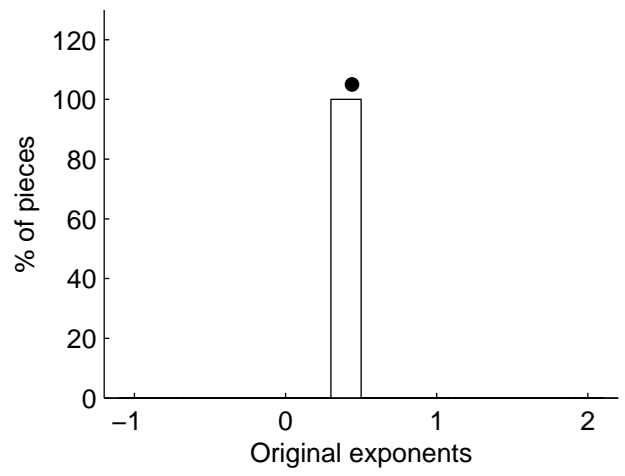

Shuffled spectra

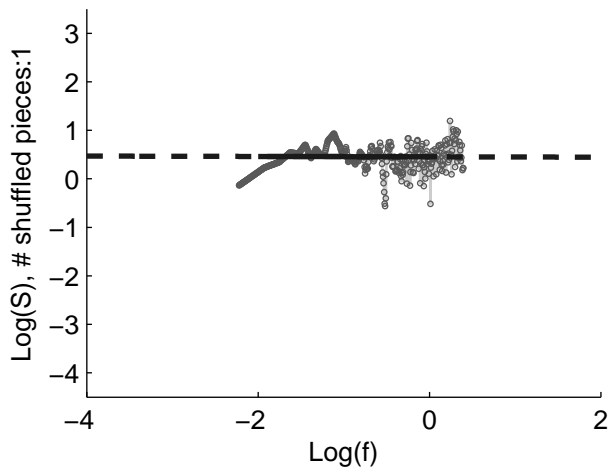

$\mu$  shuffled: 0.004

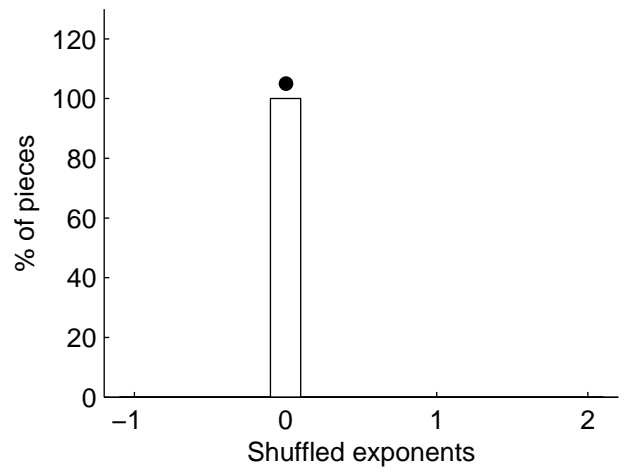

Original > Shuffled:  $p < 1.000$

**Composer:Lassus**

Original spectra

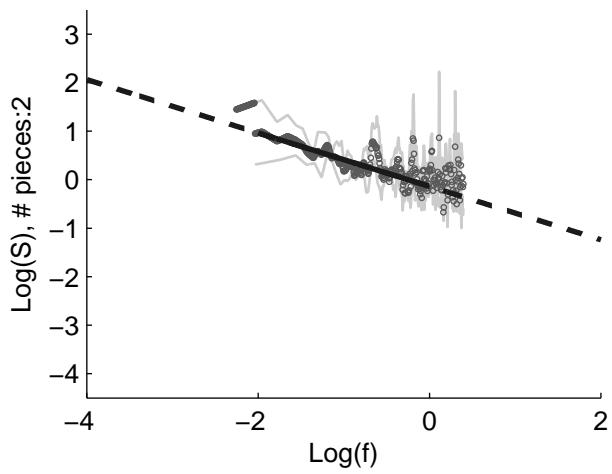

$\mu$  original: 0.543

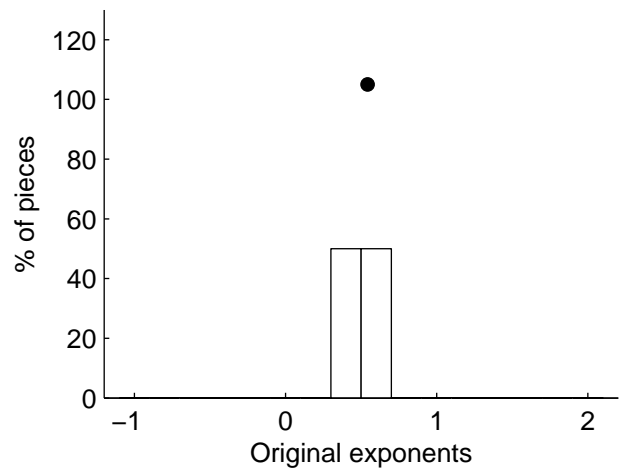

Shuffled spectra

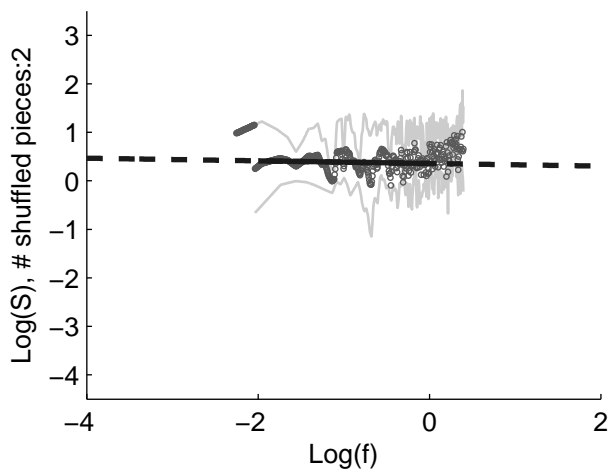

$\mu$  shuffled: 0.019

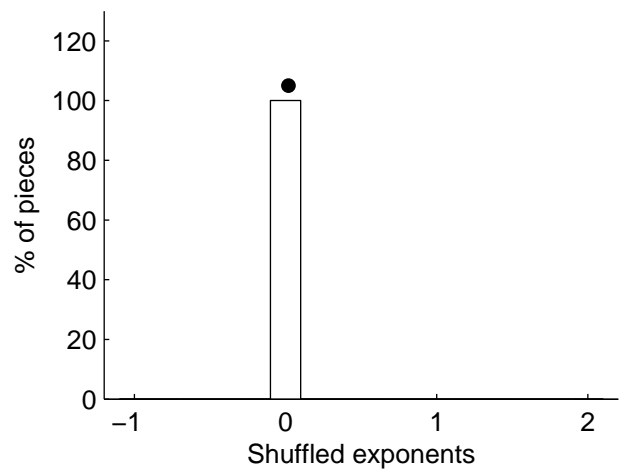

Original > Shuffled:  $p < 0.500$

**Composer:Liszt**

Original spectra

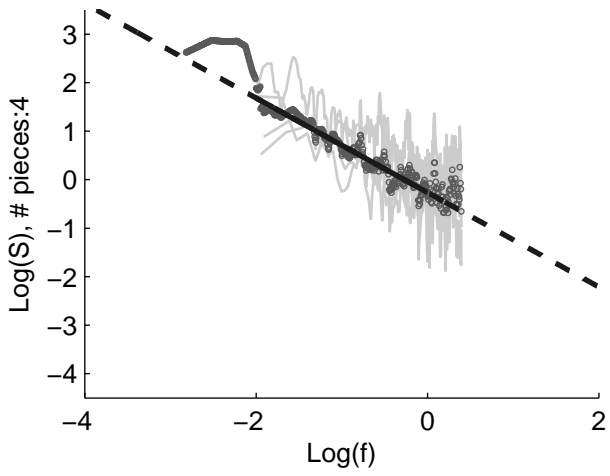

$\mu$  original: 1.025

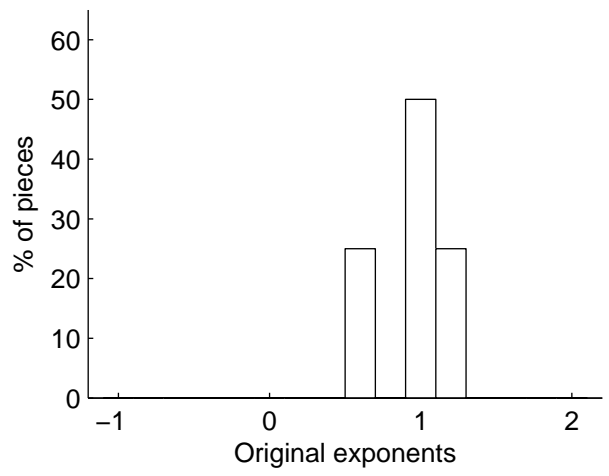

Shuffled spectra

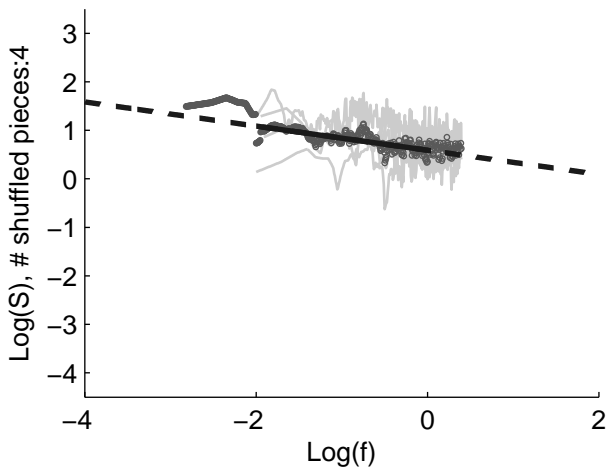

$\mu$  shuffled: 0.296

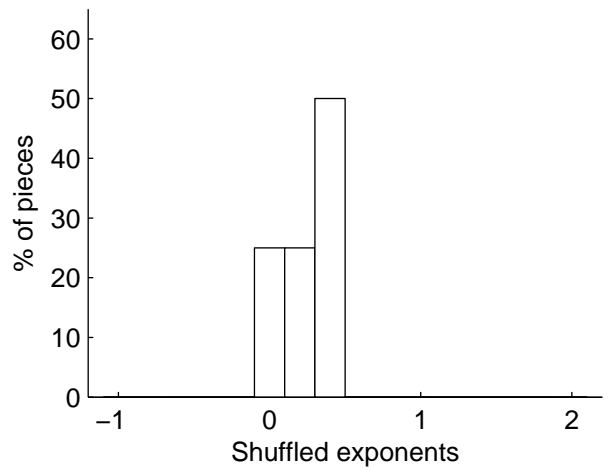

Original > Shuffled:  $p < 0.125$



**Composer:MacDowell**

Original spectra

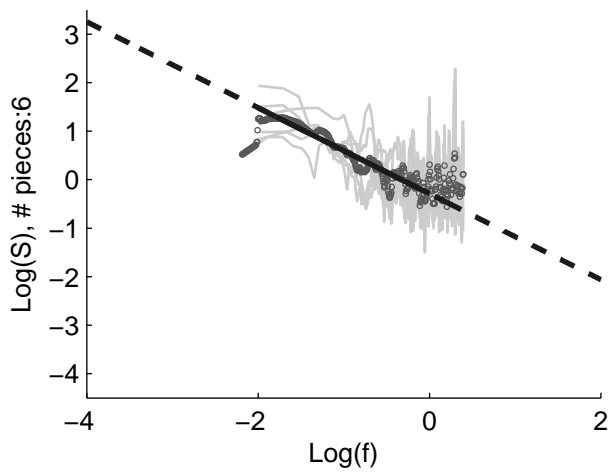

$\mu$  original: 1.013

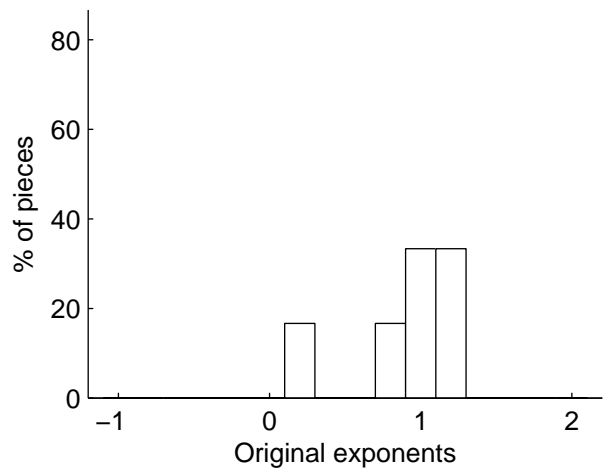

Shuffled spectra

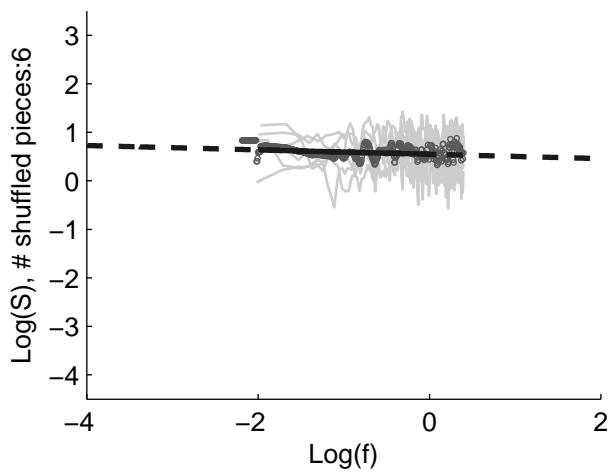

$\mu$  shuffled: 0.049

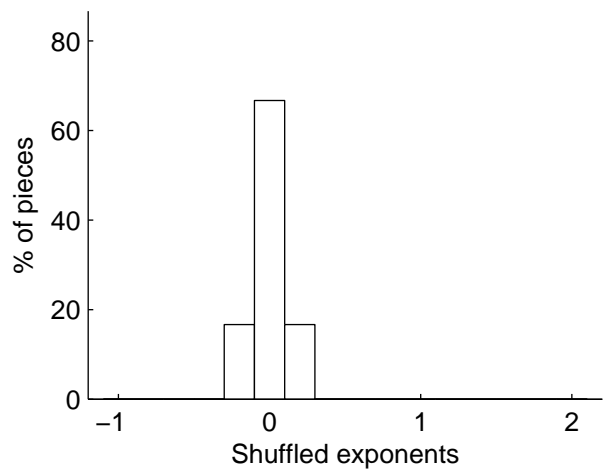

Original > Shuffled:  $p < 0.031$

**Composer:Mendelssohn**

Original spectra

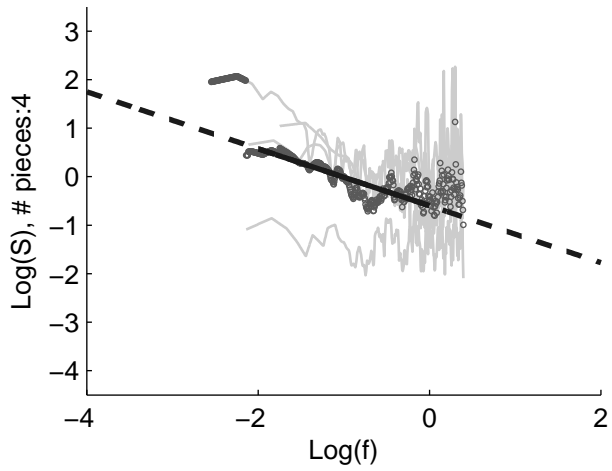

$\mu$  original: 0.528

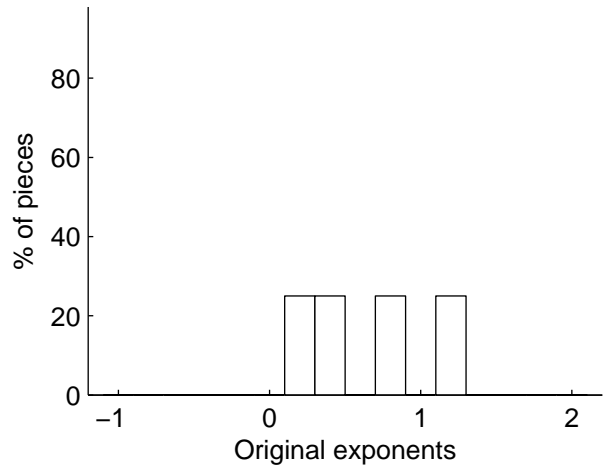

Shuffled spectra

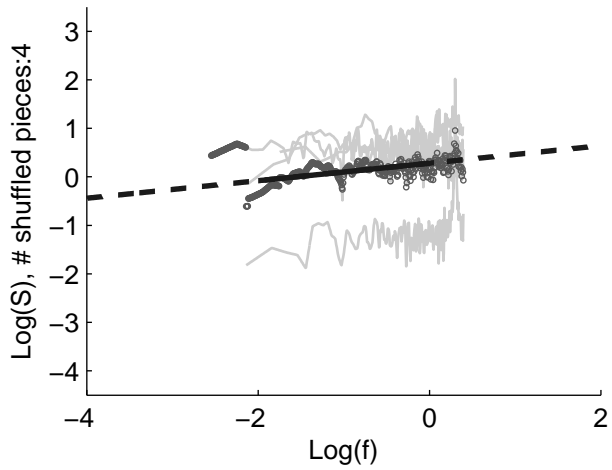

$\mu$  shuffled: -0.174

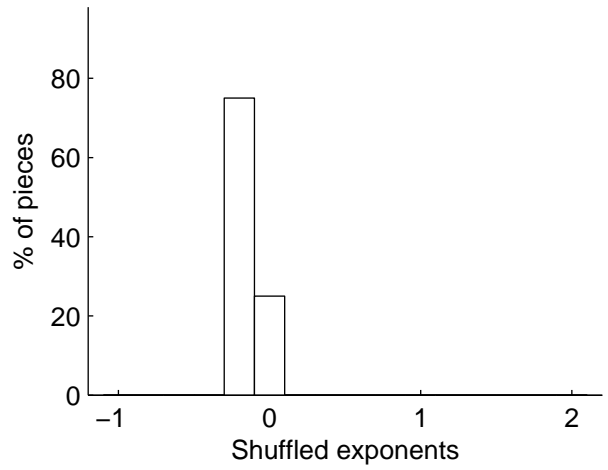

Original > Shuffled:  $p < 0.125$

**Composer:Monteverdi**

Original spectra

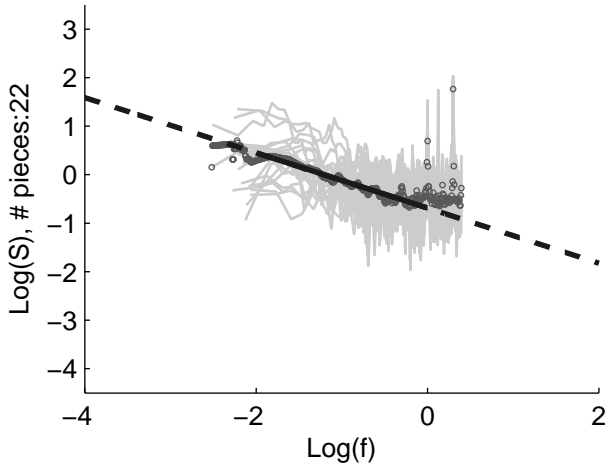

$\mu$  original: 0.502

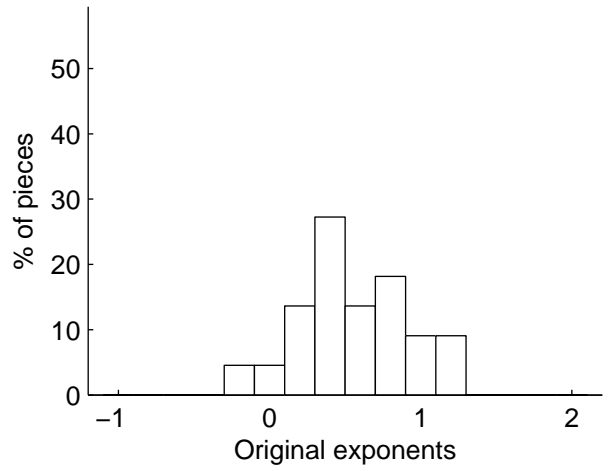

Shuffled spectra

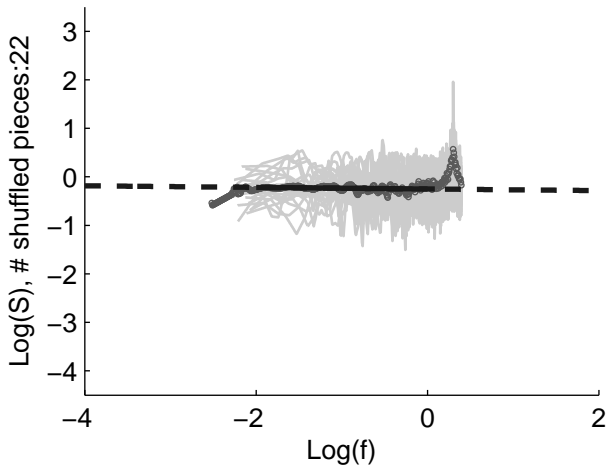

$\mu$  shuffled: -0.034

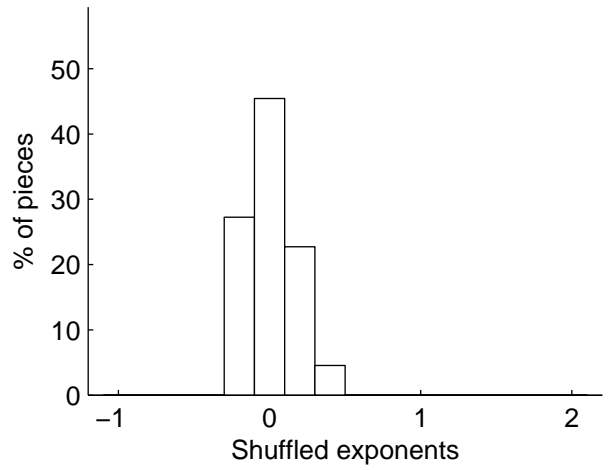

Original > Shuffled:  $p < 0.000$

**Composer: Mozart**

Original spectra

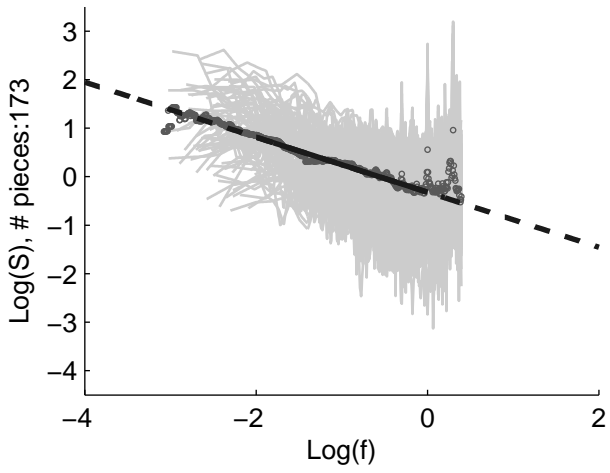

$\mu$  original: 0.628

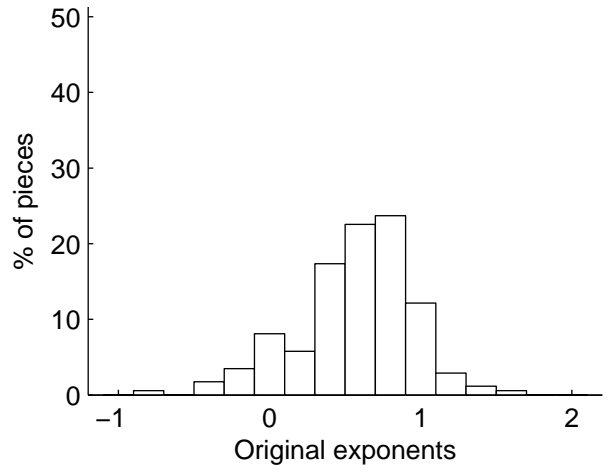

Shuffled spectra

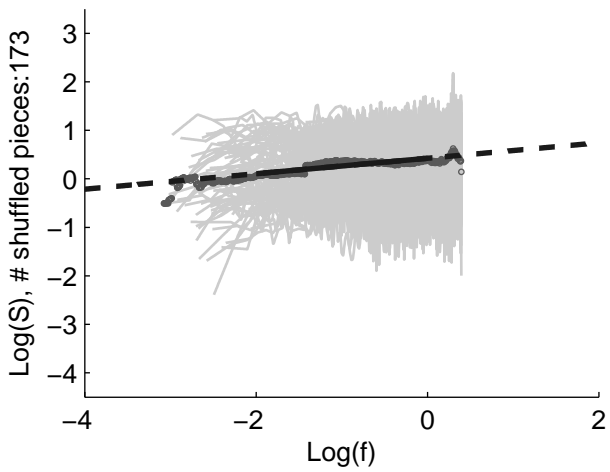

$\mu$  shuffled: -0.003

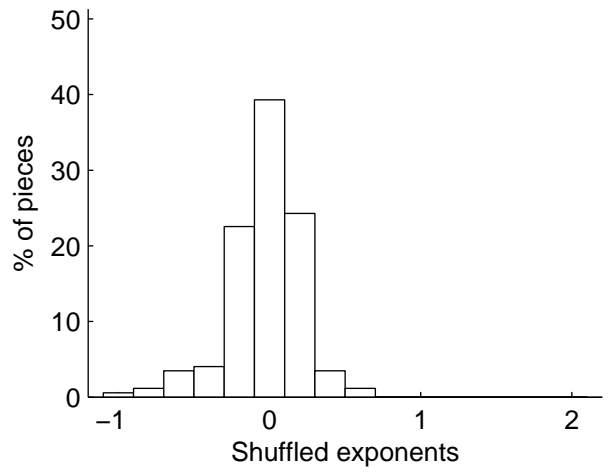

Original > Shuffled:  $p < 0.000$

**Composer:Pachelbel**

Original spectra

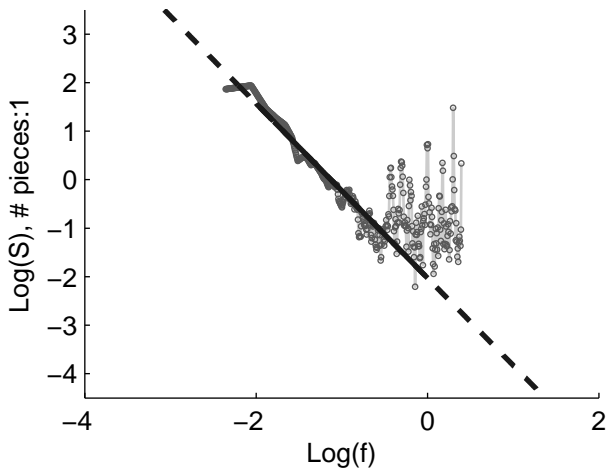

$\mu$  original: 1.799

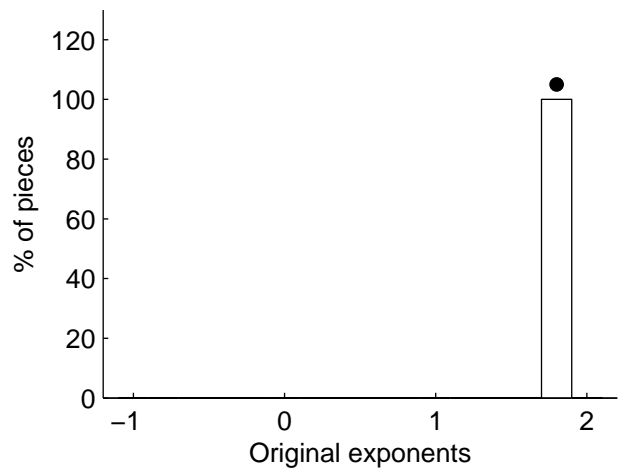

Shuffled spectra

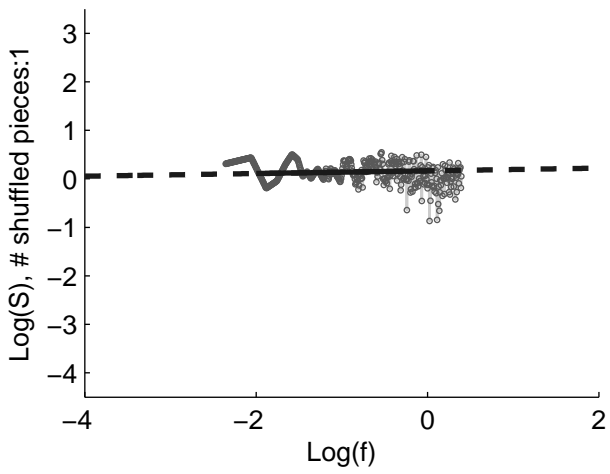

$\mu$  shuffled: -0.028

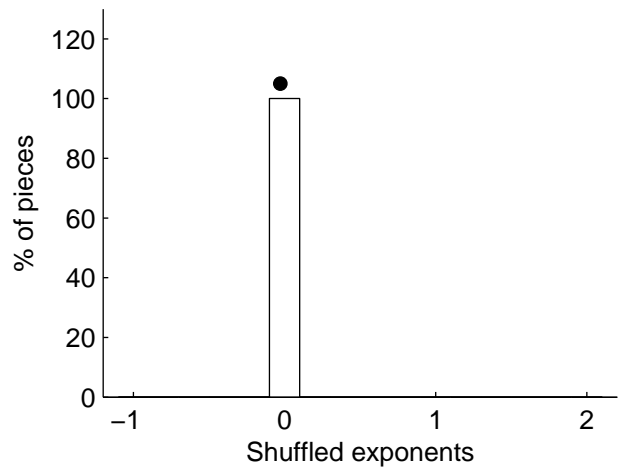

Original > Shuffled:  $p < 1.000$

**Composer: Prokofiev**

Original spectra

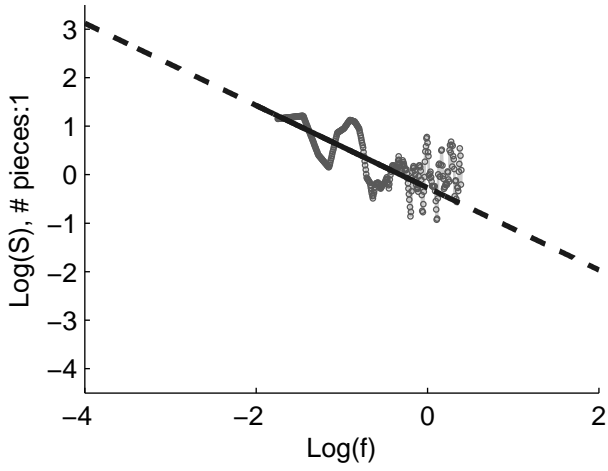

$\mu$  original: 0.848

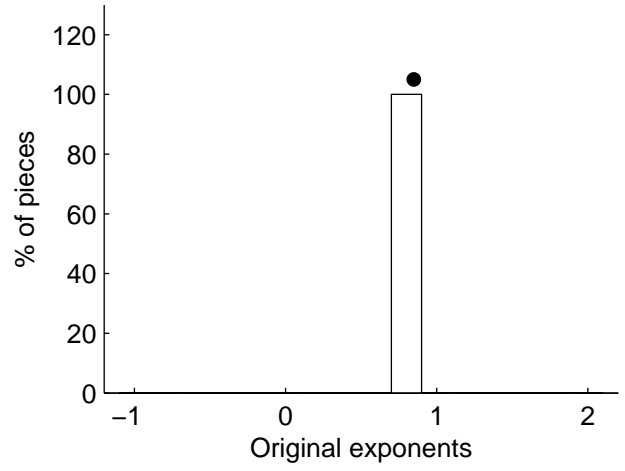

Shuffled spectra

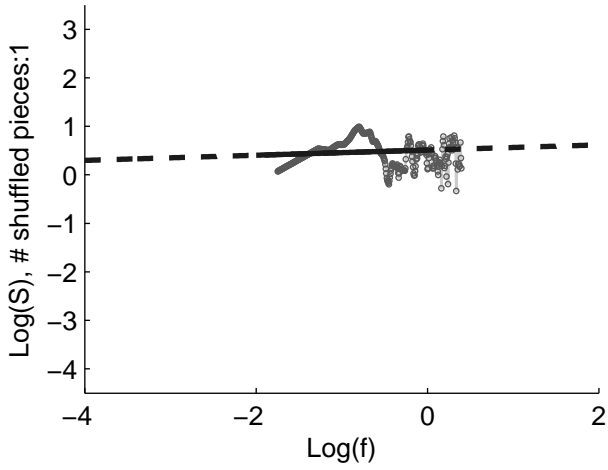

$\mu$  shuffled: -0.053

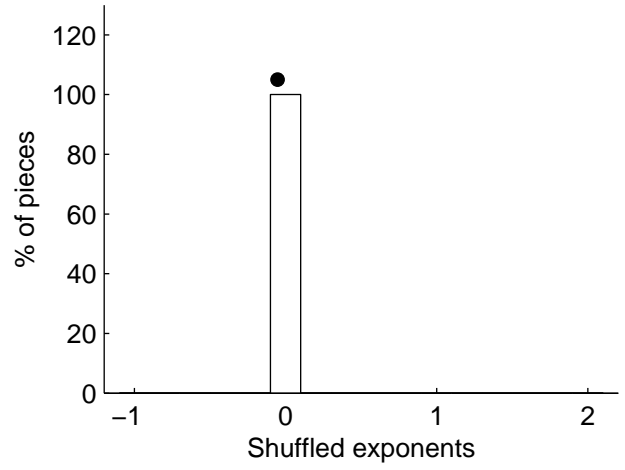

Original > Shuffled:  $p < 1.000$

**Composer:Ravel**

Original spectra

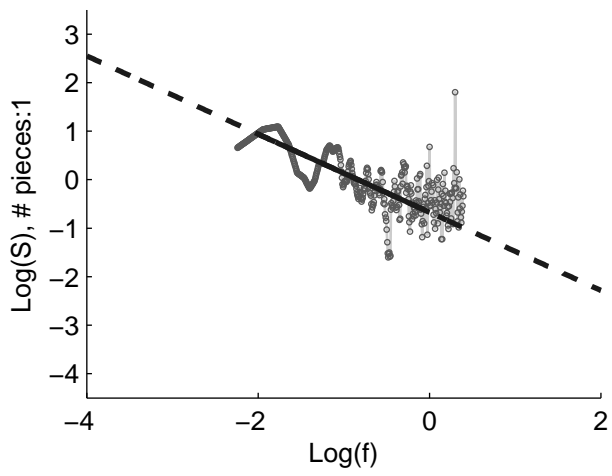

$\mu$  original: 0.806

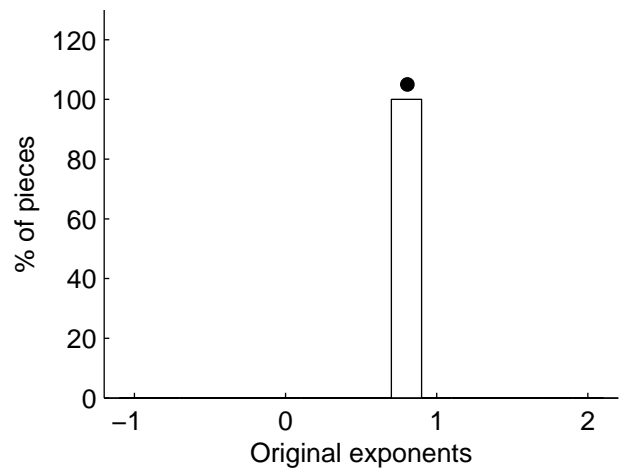

Shuffled spectra

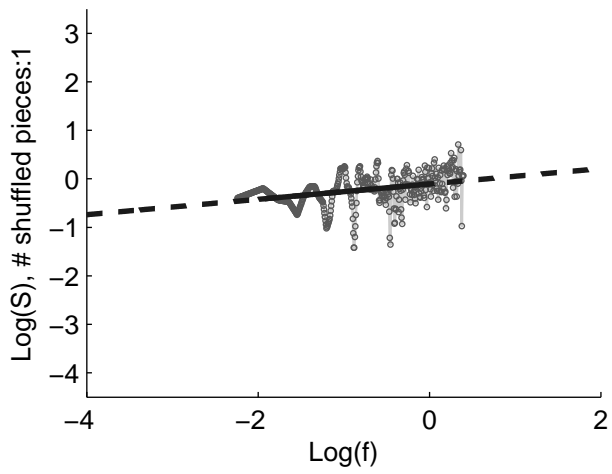

$\mu$  shuffled: -0.158

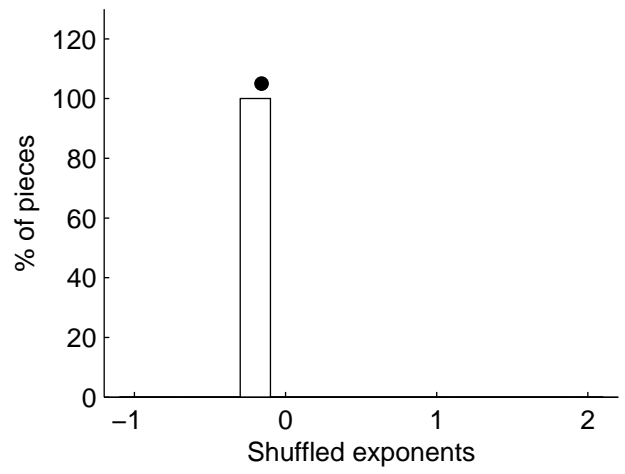

Original > Shuffled:  $p < 1.000$

**Composer: Scarlatti**

Original spectra

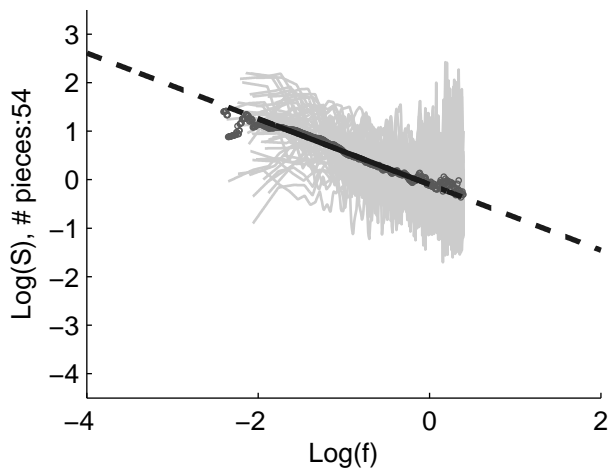

$\mu$  original: 0.735

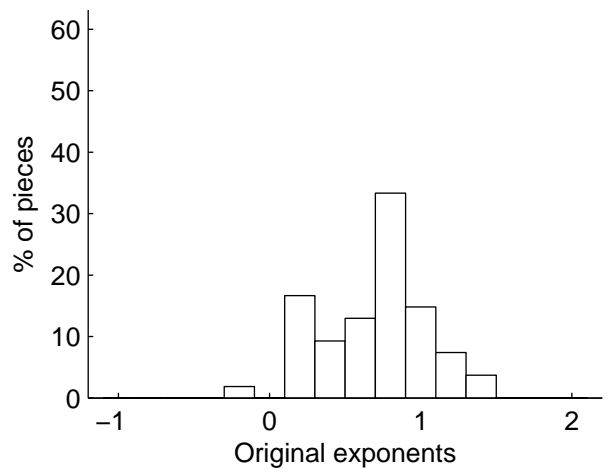

Shuffled spectra

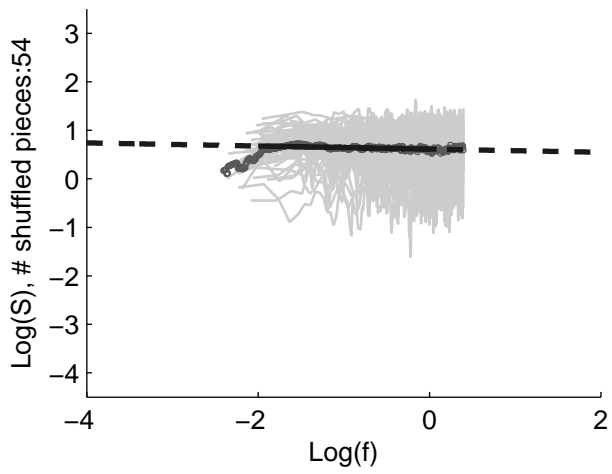

$\mu$  shuffled: 0.030

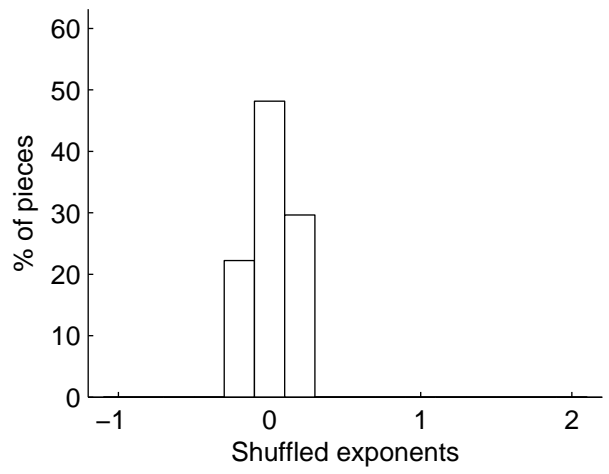

Original > Shuffled:  $p < 0.000$



**Composer: Schubert**

Original spectra

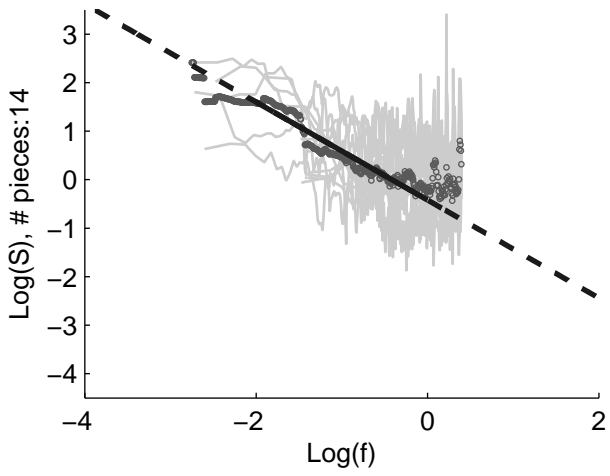

$\mu$  original: 0.801

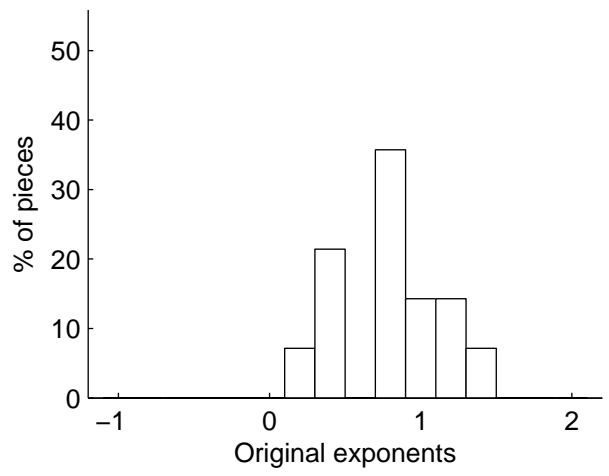

Shuffled spectra

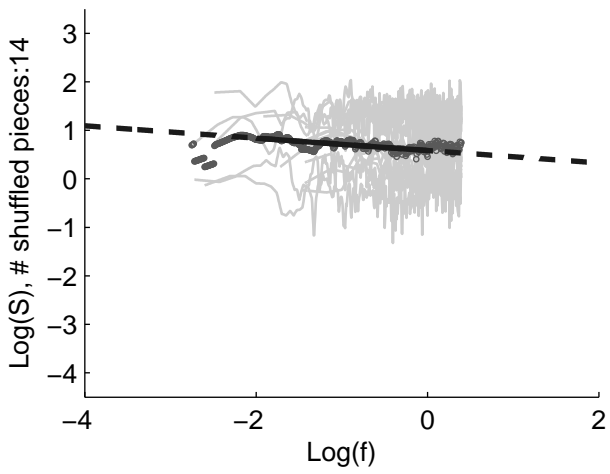

$\mu$  shuffled: 0.053

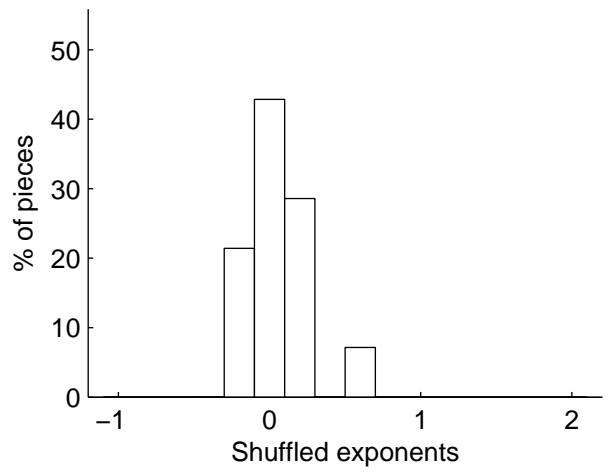

Original > Shuffled:  $p < 0.000$

**Composer:Schumann**

Original spectra

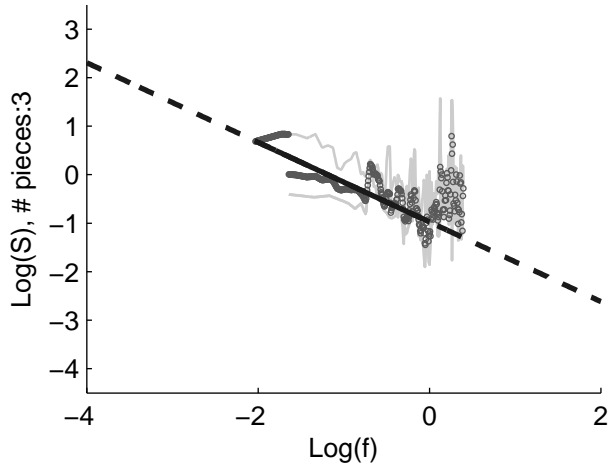

$\mu$  original: 0.364

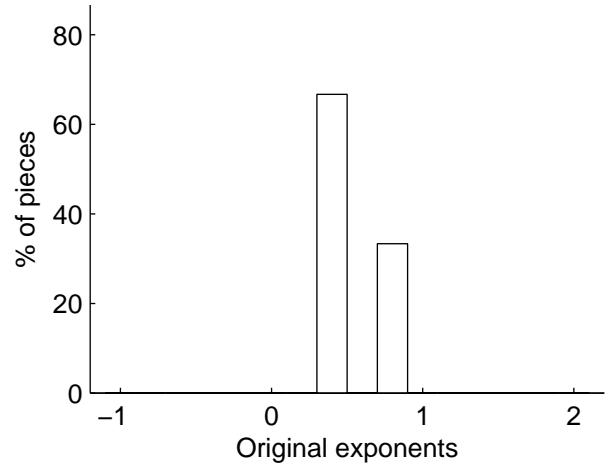

Shuffled spectra

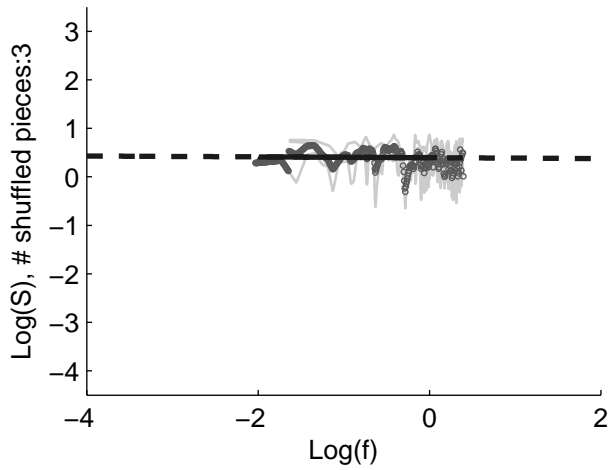

$\mu$  shuffled: 0.111

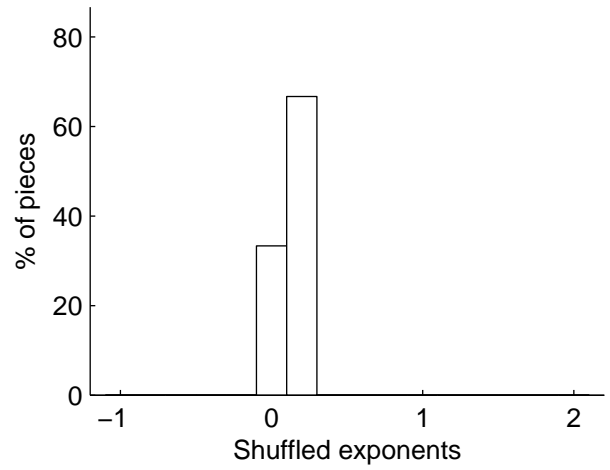

Original > Shuffled:  $p < 0.250$

**Composer:Scriabin**

Original spectra

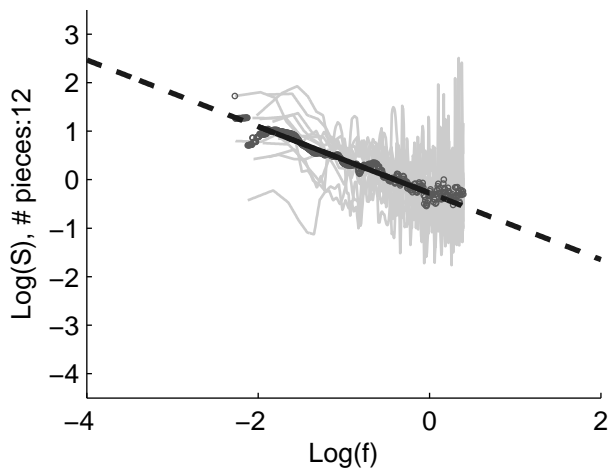

$\mu$  original: 0.789

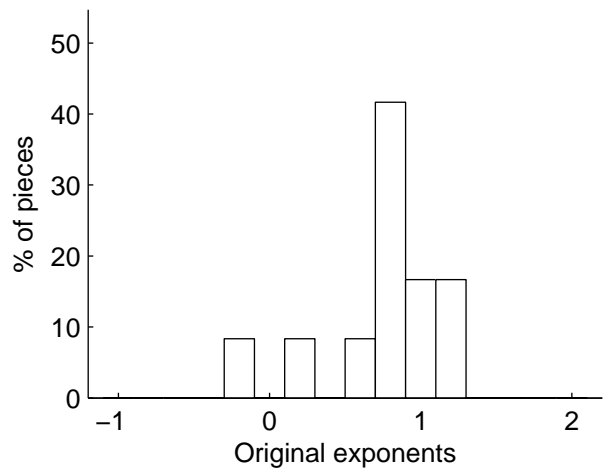

Shuffled spectra

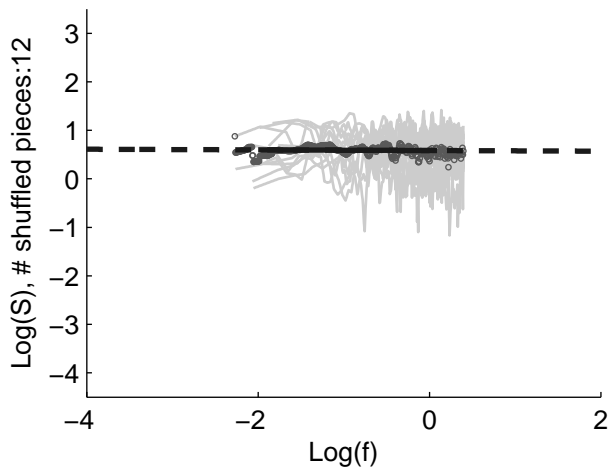

$\mu$  shuffled: -0.010

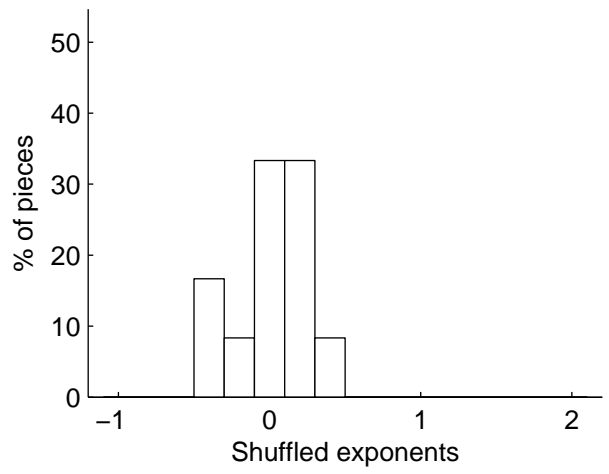

Original > Shuffled:  $p < 0.001$

**Composer:Sinding**

Original spectra

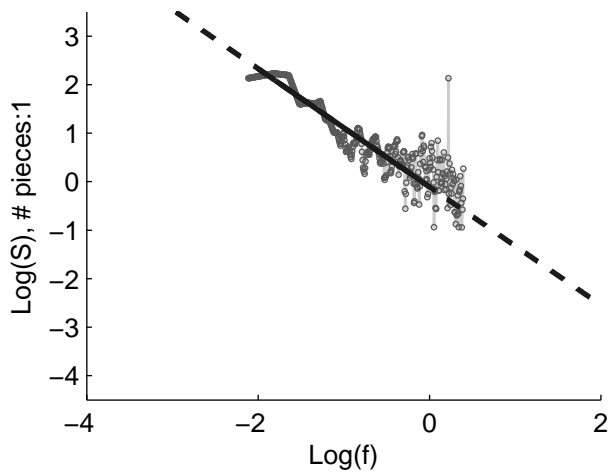

$\mu$  original: 1.218

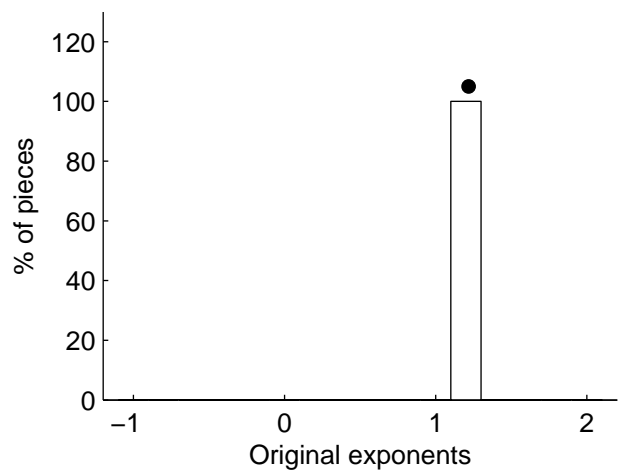

Shuffled spectra

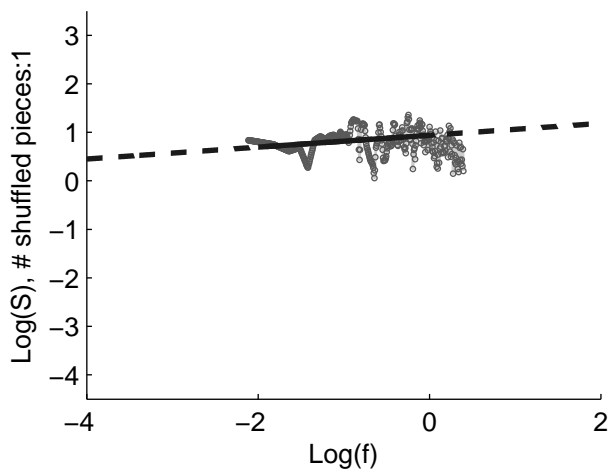

$\mu$  shuffled: -0.122

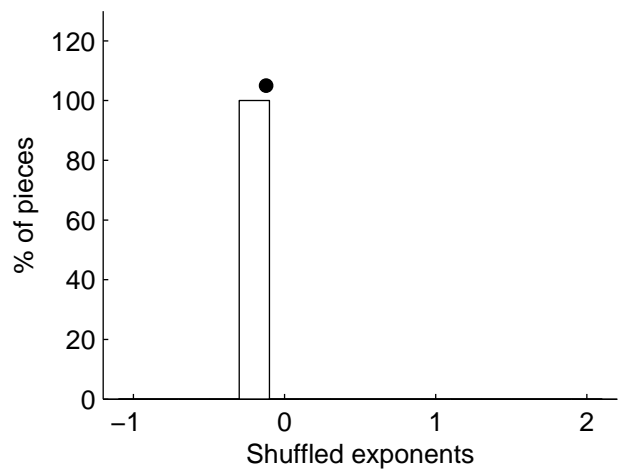

Original > Shuffled:  $p < 1.000$

**Composer: Turpin**

Original spectra

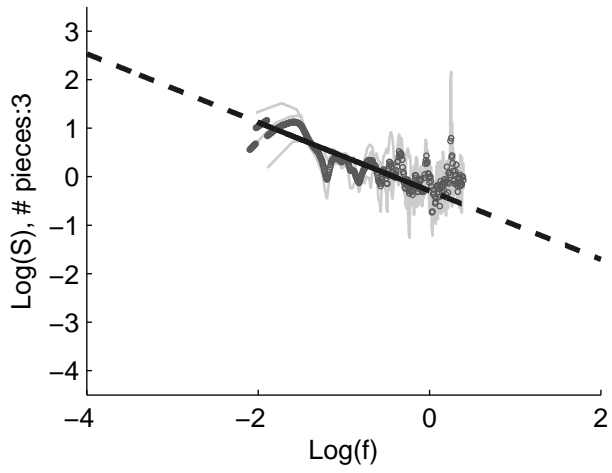

$\mu$  original: 0.836

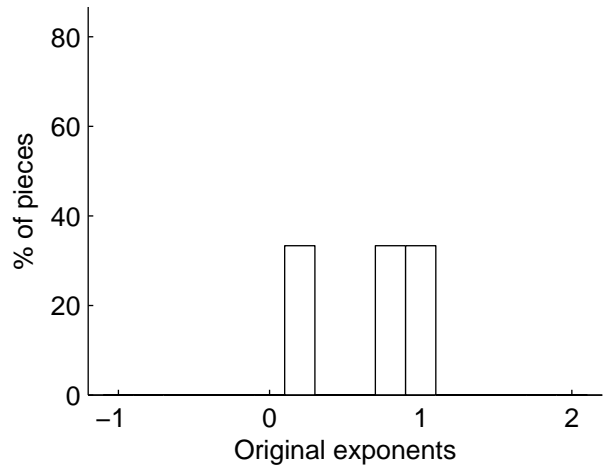

Shuffled spectra

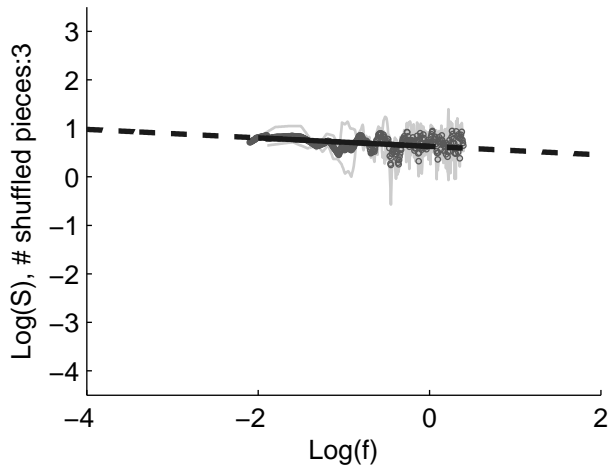

$\mu$  shuffled: 0.118

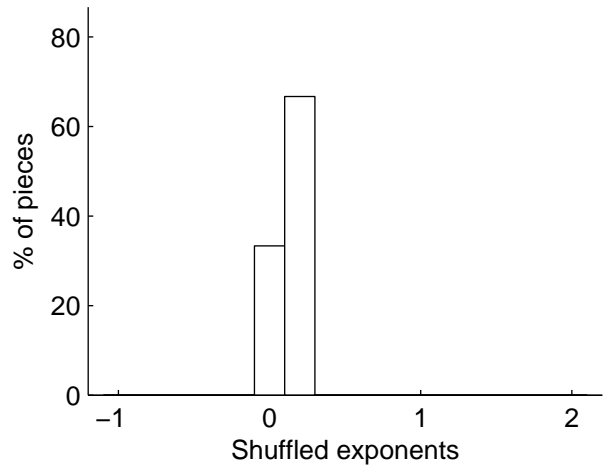

Original > Shuffled:  $p < 0.250$

**Composer:Vecchi**

Original spectra

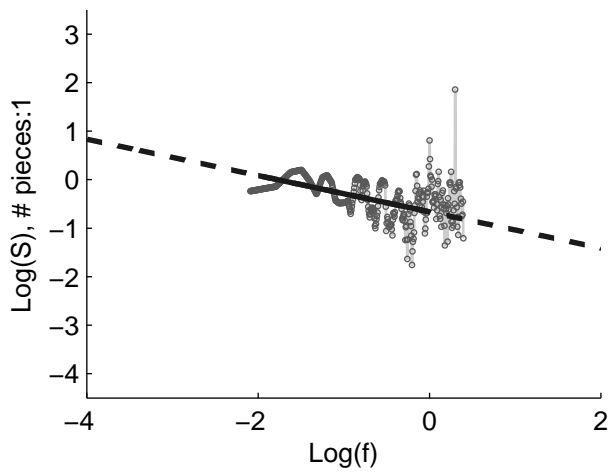

$\mu$  original: 0.374

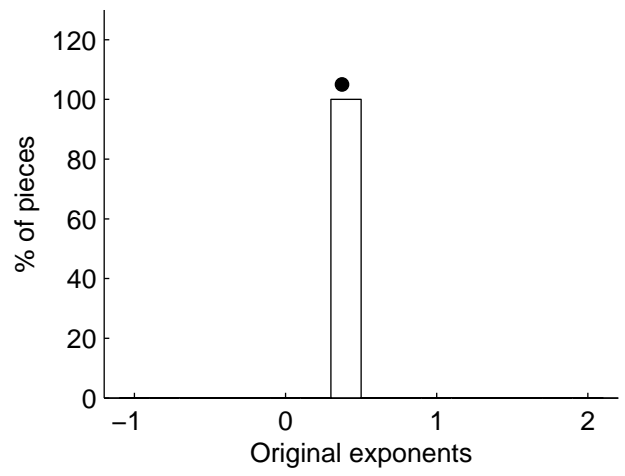

Shuffled spectra

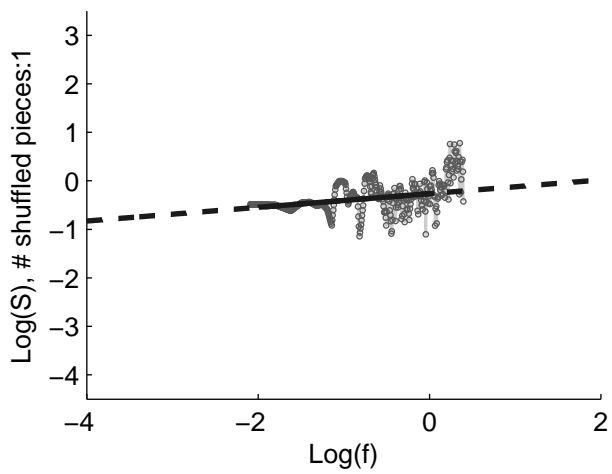

$\mu$  shuffled: -0.141

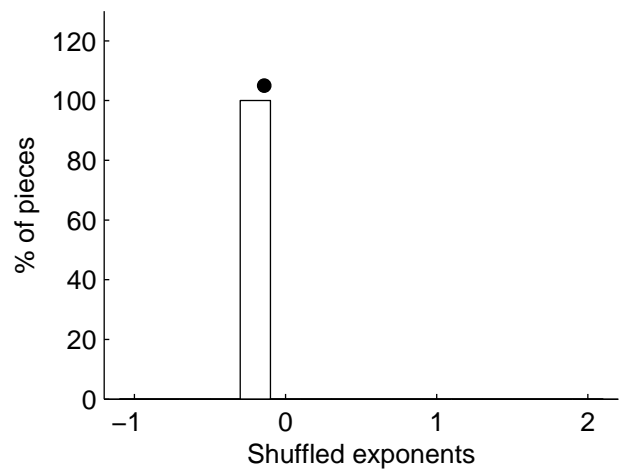

Original > Shuffled:  $p < 1.000$

**Composer:Victoria**

Original spectra

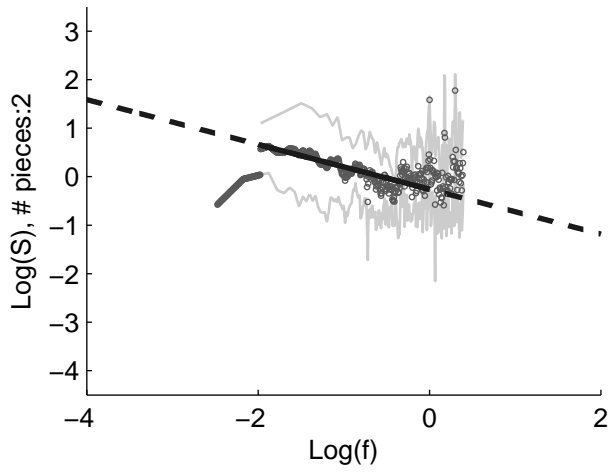

$\mu$  original: 0.460

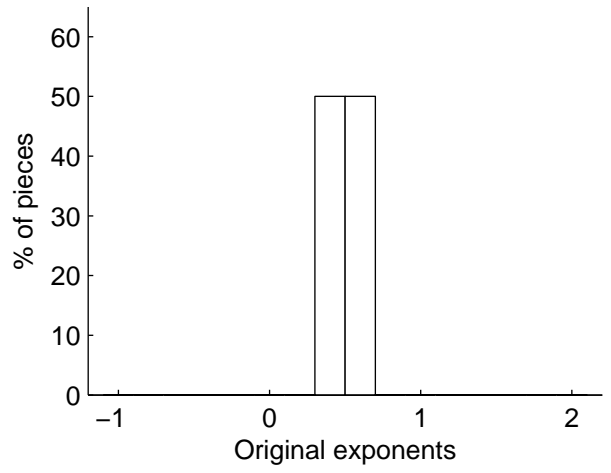

Shuffled spectra

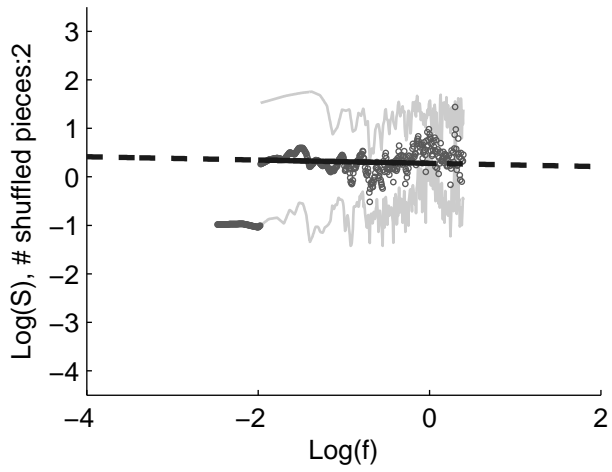

$\mu$  shuffled: 0.024

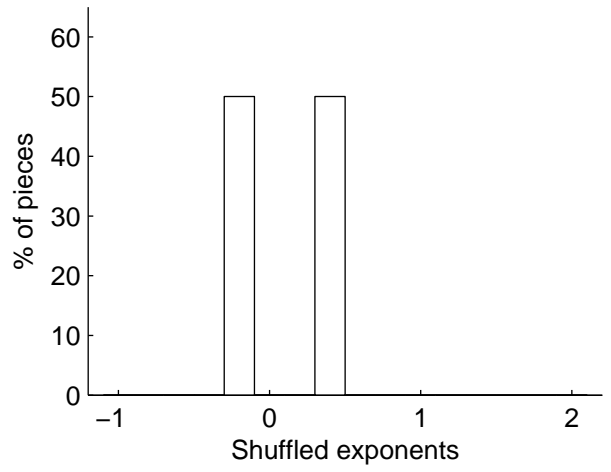

Original > Shuffled:  $p < 0.500$

**Composer: Vivaldi**

Original spectra

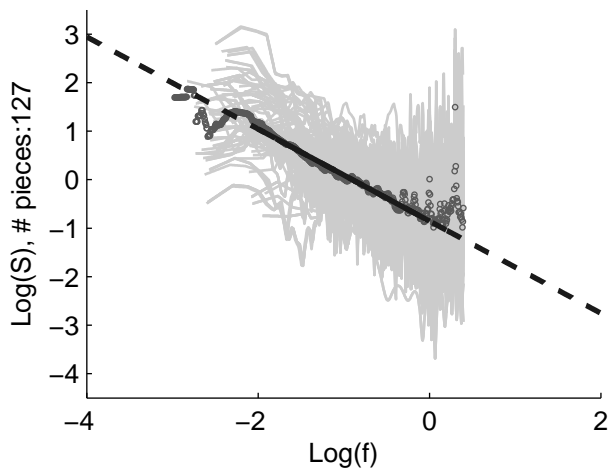

$\mu$  original: 0.974

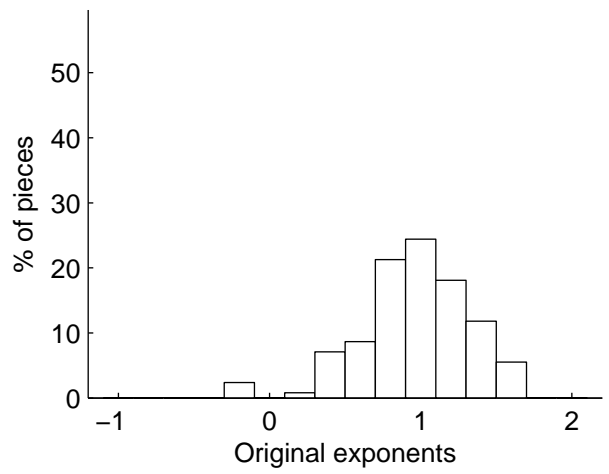

Shuffled spectra

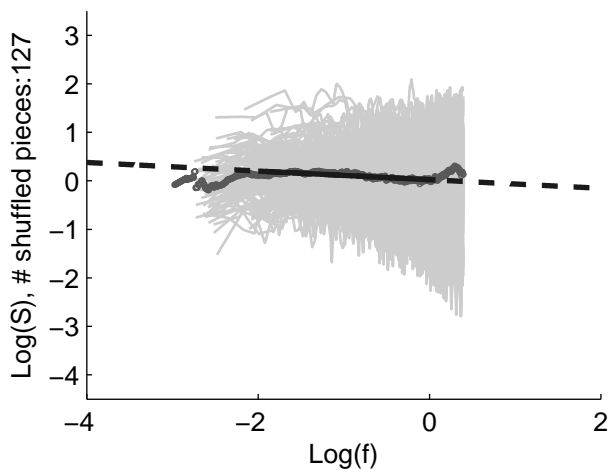

$\mu$  shuffled: 0.030

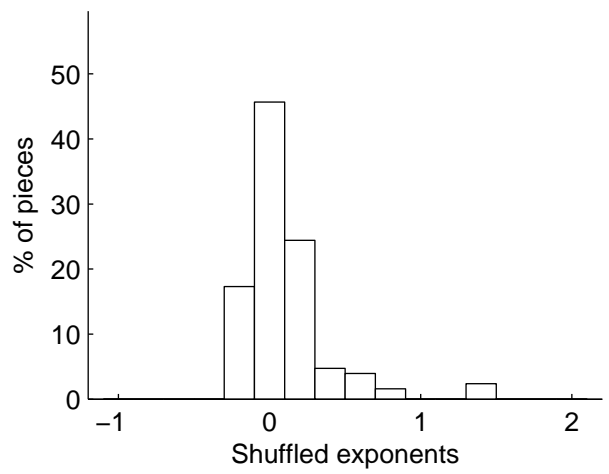

Original > Shuffled:  $p < 0.000$



**Composer: Weber**

Original spectra

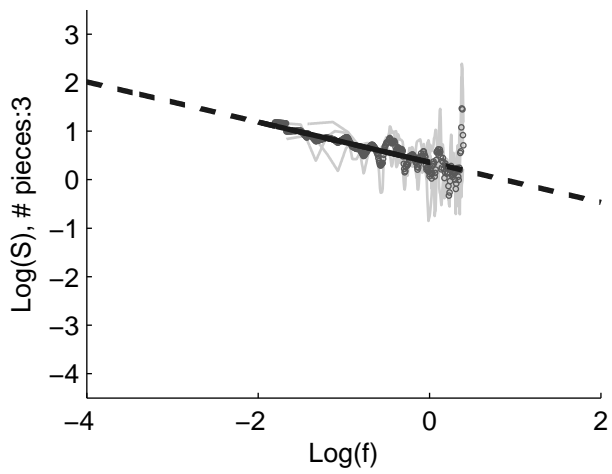

$\mu$  original: 0.457

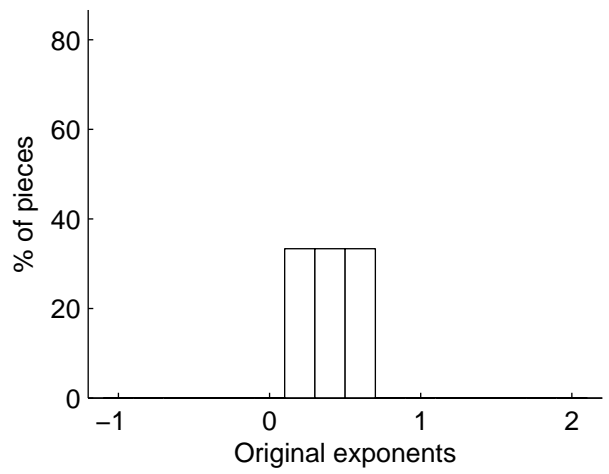

Shuffled spectra

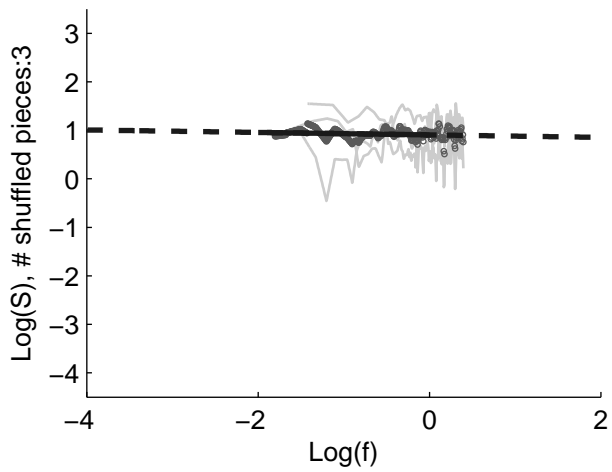

$\mu$  shuffled: 0.205

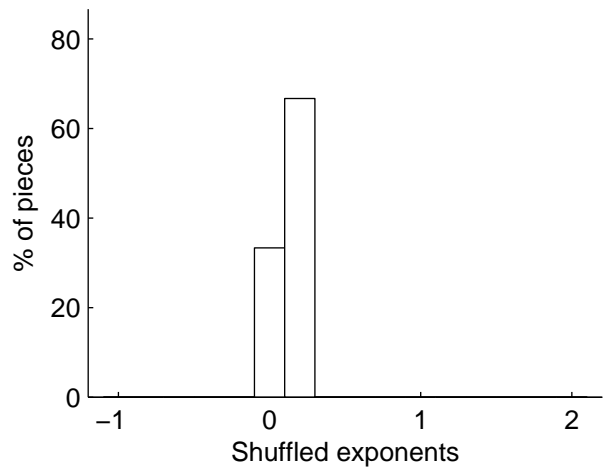

Original > Shuffled:  $p < 0.250$
